# Supplementary material for: Experimental and theoretical study of Criegee intermediate (CH2OO) reactions with n-butyraldehyde and isobutyraldehyde: kinetics, implications and atmospheric fate
Source: Royal Society of Chemistry journal article supplement (doi:10.1039/d3cp05482a), 2024-01-01
Supplement: d3cp05482a1.pdf [file d3cp05482a1.pdf]

[Supporting Information (SI)]

**Experimental and Theoretical Study of Criegee Intermediate (CH<sub>2</sub>OO) Reactions with n-Butyraldehyde and Isobutyraldehyde: Kinetics, Implications and Atmospheric Fate**

*Amit Debnath<sup>a</sup> and Balla Rajakumar<sup>a,b\*</sup>*

<sup>a</sup>Department of Chemistry, Indian Institute of Technology Madras, Chennai, 600036, India.

<sup>b</sup>Centre for Atmospheric and Climate Sciences, Indian Institute of Technology Madras, Chennai, 600036, India

\*Corresponding Email: [rajakumar@iitm.ac.in](mailto:rajakumar@iitm.ac.in)

| Sl. No. | Contents                                                                                                                                                                                                                                | Page No. |
|---------|-----------------------------------------------------------------------------------------------------------------------------------------------------------------------------------------------------------------------------------------|----------|
| 1       | <b>Figure S1:</b> Optimized geometries along with relevant structural parameters of all the stationary points for the reactions CH <sub>2</sub> OO + nBD and CH <sub>2</sub> OO + iBD obtained at B3LYP/6-311+G(2df,2p) level of theory | S4-S5    |
| 2       | <b>Table S1.</b> Cartesian coordinate for the stationary points obtained at B3LYP/6-311+G(2df,2p) level of theory                                                                                                                       | S5-S45   |
| 3       | <b>Table S2:</b> Vibrational frequencies obtained at B3LYP/6-311+G(2df,2p) level of theory                                                                                                                                              | S45-S55  |
| 4       | <b>Table S3:</b> Forward activation barriers and Thermochemical parameters with respect to the reactants                                                                                                                                | S56-S57  |
| 5       | <b>Table S4:</b> T1- Diagnostics values for multi reference character calculated at CCSD(T)-F12/cc-pVTZ-F12 level of theory                                                                                                             | S58-S59  |
| 6       | <b>Figure S2:</b> IRC Plots for all TS connecting to the                                                                                                                                                                                | S59-S61  |

|    |                                                                                                                                                                 |         |
|----|-----------------------------------------------------------------------------------------------------------------------------------------------------------------|---------|
|    | corresponding reactants and products obtained at B3LYP/6-311+G(2df,2p) level of theory                                                                          |         |
| 7  | <b>Section S2:</b> Details of MESMER Simulation                                                                                                                 | S61-S63 |
| 8  | <b>Table S5:</b> Calculated L-J parameters for the intermediates                                                                                                | S62-S63 |
| 9  | <b>Table S6:</b> Experimentally obtained pseudo-1 <sup>st</sup> order rate coefficients for the reactions CH <sub>2</sub> OO + nBD and CH <sub>2</sub> OO + iBD | S63-S65 |
| 10 | <b>Figure S3:</b> Sensitivity test of $k_{exp}$ on rate coefficients of the title reactions                                                                     | S65     |
| 11 | <b>Section S3:</b> Thermochemistry                                                                                                                              | S65-S66 |
| 12 | <b>Table S7:</b> Thermochemical parameters for various pathways for CH <sub>2</sub> OO + nBD and CH <sub>2</sub> OO + iBD                                       | S66     |
| 13 | <b>Table S8:</b> Equilibrium constant between the reactants and the IM1 calculated at CCSD(T)-F12/cc-pVTZ-F12//B3LYP/6-311+G(2df,2p) level of theory            | S66-S67 |
| 14 | <b>Table S9.</b> Calculated CVT and CVT/SCT rate coefficients showing the tunnelling effect for IM1 → SOZ step in both the reactions.                           | S67     |
| 15 | <b>Table S10.</b> Rate coefficients for CH <sub>2</sub> OO + nBD and CH <sub>2</sub> OO + iBD obtained from CVT/SCT and MESMER calculations                     | S67-S68 |
| 16 | <b>Section S4:</b> Error propagation due to uncertainties of the concentration measurement                                                                      | S68-S69 |
| 17 | <b>Table S11:</b> Propagated upper and lower limit of the rate coefficients                                                                                     | S68-S69 |

|    |                                                                                                                                                 |         |
|----|-------------------------------------------------------------------------------------------------------------------------------------------------|---------|
| 18 | <b>Table S12.</b> Rate coefficients for the product formation pathways from SOZs obtained from and MESMER calculations                          | S69-S70 |
| 19 | <b>Section S5:</b> Cumulative Atmospheric Lifetime calculation and rate comparison of CH <sub>2</sub> OO + nBD/iBD with OH + nBD/iBD            | S70-S72 |
| 20 | <b>Table S13.</b> Rate ratios for the reactions CH <sub>2</sub> OO + nBD and OH + nBD (top) and CH <sub>2</sub> OO + iBD and OH + iBD (bottom). | S71     |
| 21 | <b>References</b>                                                                                                                               | S72-S73 |

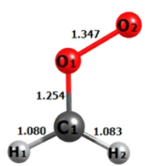

Criegee Intermediate

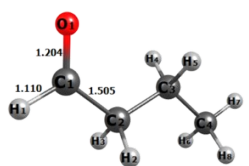

N-butylaldehyde

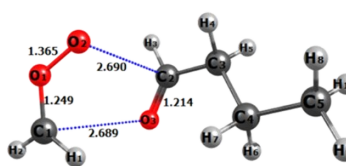

IM1n

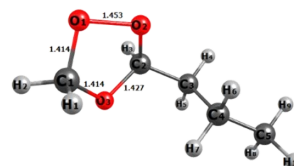

SOZ-n

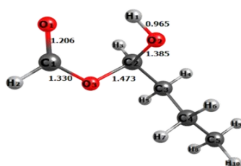

IM2n

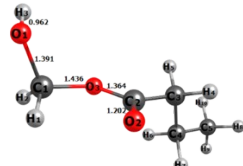

IM3n

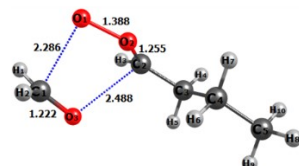

IM4n

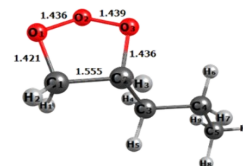

POZ-n

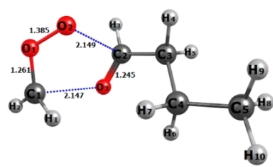

TS1n

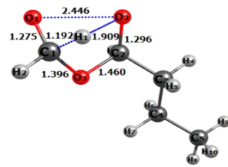

TS2n

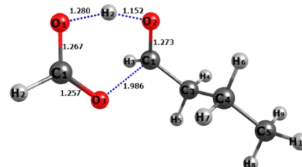

TS3n

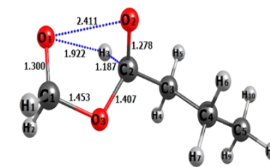

TS4n

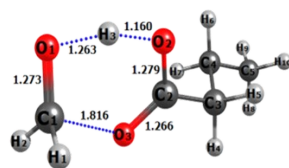

TS5n

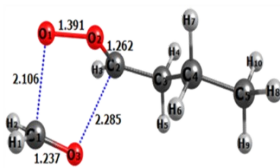

TS6n

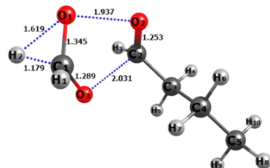

TS7n

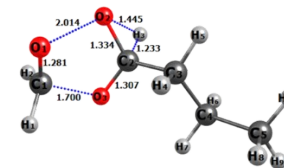

TS8n

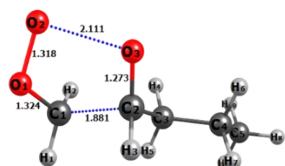

TS9n

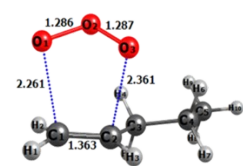

TS10n

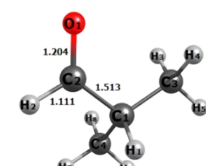

Iso-butylaldehyde

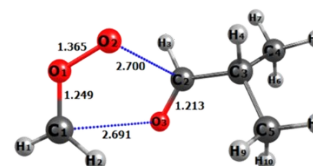

IM1i

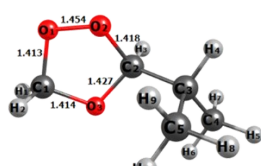

SOZ-i

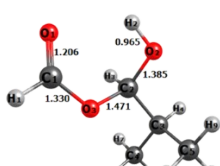

IM2i

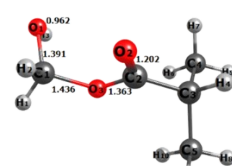

IM3i

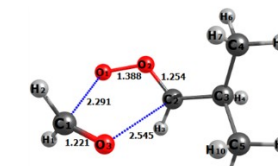

IM4i

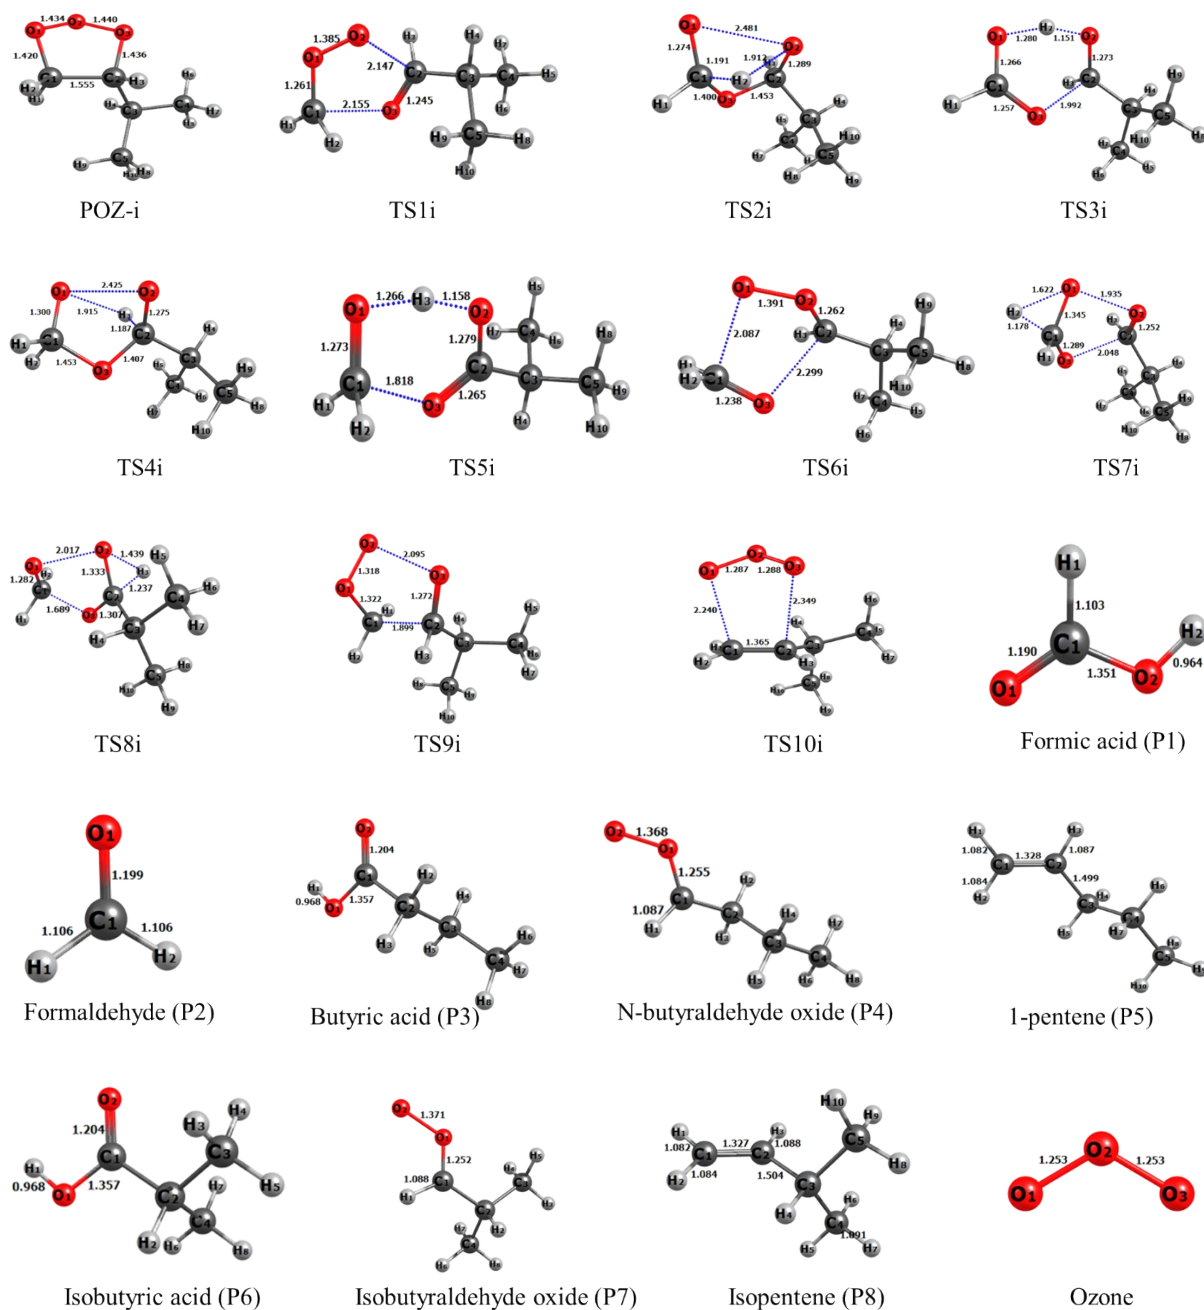

**Figure S1.** Optimized geometries along with relevant structural parameters of all the stationary points (viz. reactants, pre and post-reactive complexes (IM), transition states (TS) and products) for the reactions  $\text{CH}_2\text{OO} + \text{nBD}$  and  $\text{CH}_2\text{OO} + \text{iBD}$  obtained at B3LYP/6-311+G(2df,2p).

**Table S1.** Cartesian coordinates optimised at B3LYB/6-311+G(3df,2p) level of theory:

**Table S1.1.** Optimised parameters of CH<sub>2</sub>OO.

| Cartesian coordinate |      |            |           |           |   |
|----------------------|------|------------|-----------|-----------|---|
| Center No.           | Atom | Atomic No. | X         | Y         | Z |
| 1                    | C    | 6          | 1.069420  | -0.197420 | 0 |
| 2                    | H    | 1          | 1.973480  | 0.394200  | 0 |
| 3                    | H    | 1          | 1.029020  | -1.279770 | 0 |
| 4                    | O    | 8          | 0.000000  | 0.456880  | 0 |
| 5                    | O    | 8          | -1.177380 | -0.198120 | 0 |

**Table S1.2.** Optimised parameters of nBD.

| Cartesian coordinate |      |            |           |           |           |
|----------------------|------|------------|-----------|-----------|-----------|
| Center No.           | Atom | Atomic No. | X         | Y         | Z         |
| 1                    | C    | 6          | -1.459320 | -0.218620 | 0.285180  |
| 2                    | O    | 8          | -2.421330 | 0.110210  | -0.360290 |
| 3                    | H    | 1          | -1.519740 | -1.095230 | 0.965920  |
| 4                    | C    | 6          | 1.010590  | -0.503510 | -0.138090 |
| 5                    | H    | 1          | 0.988710  | -1.372560 | 0.524950  |
| 6                    | H    | 1          | 0.824310  | -0.881540 | -1.145950 |
| 7                    | C    | 6          | -0.118930 | 0.463370  | 0.251030  |
| 8                    | H    | 1          | 0.076290  | 0.850640  | 1.258150  |
| 9                    | H    | 1          | -0.171120 | 1.311350  | -0.432060 |
| 10                   | C    | 6          | 2.390140  | 0.150140  | -0.080260 |

|    |   |   |          |           |           |
|----|---|---|----------|-----------|-----------|
| 11 | H | 1 | 2.617100 | 0.504030  | 0.926900  |
| 12 | H | 1 | 3.170830 | -0.553640 | -0.369640 |
| 13 | H | 1 | 2.449440 | 1.006930  | -0.753080 |

**Table S1.2.** Optimised parameters of iBD.

| Cartesian coordinate |      |            |           |           |           |
|----------------------|------|------------|-----------|-----------|-----------|
| Center No.           | Atom | Atomic No. | X         | Y         | Z         |
| 1                    | C    | 6          | 0.424730  | 0.011300  | 0.412360  |
| 2                    | H    | 1          | 0.591480  | -0.042070 | 1.497030  |
| 3                    | C    | 6          | -0.936770 | -0.613910 | 0.202850  |
| 4                    | O    | 8          | -1.894830 | -0.061620 | -0.272650 |
| 5                    | H    | 1          | -1.008110 | -1.674580 | 0.527060  |
| 6                    | C    | 6          | 0.480420  | 1.465900  | -0.041100 |
| 7                    | H    | 1          | 0.314180  | 1.543100  | -1.115720 |
| 8                    | H    | 1          | -0.286090 | 2.063340  | 0.449730  |
| 9                    | H    | 1          | 1.454800  | 1.899340  | 0.185020  |
| 10                   | C    | 6          | 1.495320  | -0.868770 | -0.255060 |
| 11                   | H    | 1          | 2.492750  | -0.508890 | -0.004930 |
| 12                   | H    | 1          | 1.424440  | -1.907900 | 0.069740  |
| 13                   | H    | 1          | 1.392880  | -0.846520 | -1.341060 |

**Table S1.3.** Optimised parameters of IM1n.

| Cartesian coordinate |      |            |           |           |           |
|----------------------|------|------------|-----------|-----------|-----------|
| Center No.           | Atom | Atomic No. | X         | Y         | Z         |
| 1                    | C    | 6          | -0.006010 | 1.042194  | -0.688260 |
| 2                    | H    | 1          | 0.501667  | 1.215995  | -1.653420 |
| 3                    | O    | 8          | 0.465093  | 1.490490  | 0.336584  |
| 4                    | O    | 8          | 1.519590  | -1.173070 | -0.712230 |
| 5                    | O    | 8          | 2.595051  | -0.531790 | -0.169730 |
| 6                    | C    | 6          | 2.506109  | -0.126150 | 1.008718  |
| 7                    | H    | 1          | 3.370433  | 0.408492  | 1.378151  |
| 8                    | H    | 1          | 1.614552  | -0.326320 | 1.585429  |
| 9                    | C    | 6          | -1.311100 | 0.304067  | -0.786380 |
| 10                   | H    | 1          | -1.127080 | -0.592850 | -1.384580 |
| 11                   | C    | 6          | -1.974860 | -0.036210 | 0.542521  |
| 12                   | H    | 1          | -1.299070 | -0.669050 | 1.120755  |
| 13                   | H    | 1          | -2.106380 | 0.877256  | 1.124894  |
| 14                   | H    | 1          | -1.968900 | 0.930634  | -1.404220 |
| 15                   | C    | 6          | -3.318010 | -0.742610 | 0.363965  |
| 16                   | H    | 1          | -3.204820 | -1.677560 | -0.187930 |
| 17                   | H    | 1          | -3.769970 | -0.980490 | 1.327358  |
| 18                   | H    | 1          | -4.025060 | -0.118920 | -0.186810 |

**Table S1.6.** Optimised parameters of SOZ-n.

| Cartesian coordinate |
|----------------------|
|----------------------|



| Center No. | Atom | Atomic No. | X         | Y         | Z         |
|------------|------|------------|-----------|-----------|-----------|
| 1          | C    | 6          | -0.438190 | -0.454600 | 0.694744  |
| 2          | H    | 1          | -0.858390 | -1.006800 | 1.542005  |
| 3          | O    | 8          | -0.959020 | 0.874094  | 0.721858  |
| 4          | O    | 8          | -0.934130 | -1.003950 | -0.515950 |
| 5          | O    | 8          | -2.278300 | -0.451230 | -0.532540 |
| 6          | C    | 6          | -1.994370 | 0.902368  | -0.240520 |
| 7          | H    | 1          | -2.905610 | 1.335478  | 0.172481  |
| 8          | H    | 1          | -1.657530 | 1.436165  | -1.134060 |
| 9          | C    | 6          | 1.077202  | -0.492180 | 0.701124  |
| 10         | H    | 1          | 1.378421  | -1.543030 | 0.696580  |
| 11         | C    | 6          | 1.759376  | 0.266960  | -0.437600 |
| 12         | H    | 1          | 1.451903  | -0.158950 | -1.393460 |
| 13         | H    | 1          | 1.414727  | 1.302183  | -0.432050 |
| 14         | C    | 6          | 3.282873  | 0.229397  | -0.322240 |
| 15         | H    | 1          | 3.753177  | 0.774712  | -1.140780 |
| 16         | H    | 1          | 3.621810  | 0.679940  | 0.612713  |
| 17         | H    | 1          | 3.658928  | -0.795190 | -0.349500 |
| 18         | H    | 1          | 1.392836  | -0.087500 | 1.666074  |

**Table S1.4.** Optimised parameters of IM2n.

| Cartesian coordinate |      |            |   |   |   |
|----------------------|------|------------|---|---|---|
| Center No.           | Atom | Atomic No. | X | Y | Z |

|    |   |   |           |           |           |
|----|---|---|-----------|-----------|-----------|
| 1  | C | 6 | 0.364757  | 0.431061  | 0.492710  |
| 2  | H | 1 | 0.905047  | 0.672098  | 1.410637  |
| 3  | O | 8 | 0.926864  | -0.851210 | 0.034737  |
| 4  | O | 8 | 0.539447  | 1.416141  | -0.465610 |
| 5  | O | 8 | 2.990626  | 0.064808  | -0.033800 |
| 6  | C | 6 | 2.242323  | -0.871980 | -0.160820 |
| 7  | H | 1 | 1.481122  | 1.625654  | -0.504250 |
| 8  | H | 1 | 2.562123  | -1.876330 | -0.463510 |
| 9  | C | 6 | -1.107700 | 0.202248  | 0.758158  |
| 10 | H | 1 | -1.490260 | 1.117384  | 1.216434  |
| 11 | C | 6 | -1.939620 | -0.150050 | -0.476730 |
| 12 | H | 1 | -1.829770 | 0.640142  | -1.219920 |
| 13 | H | 1 | -1.544200 | -1.060310 | -0.930460 |
| 14 | C | 6 | -3.417280 | -0.343150 | -0.138150 |
| 15 | H | 1 | -3.995620 | -0.594050 | -1.027650 |
| 16 | H | 1 | -3.558530 | -1.148570 | 0.585501  |
| 17 | H | 1 | -3.848200 | 0.563841  | 0.290492  |
| 18 | H | 1 | -1.192160 | -0.586550 | 1.509027  |

**Table S1.5.** Optimised parameters of IM3n.

| Cartesian coordinate |      |            |          |          |          |
|----------------------|------|------------|----------|----------|----------|
| Center No.           | Atom | Atomic No. | X        | Y        | Z        |
| 1                    | C    | 6          | 0.178625 | 0.538328 | 0.105015 |

|    |   |   |           |           |           |
|----|---|---|-----------|-----------|-----------|
| 2  | H | 1 | 3.224202  | -1.192080 | 0.932183  |
| 3  | O | 8 | 0.922940  | -0.589150 | -0.080300 |
| 4  | O | 8 | 0.560965  | 1.642110  | -0.177160 |
| 5  | O | 8 | 3.179005  | -0.345050 | 0.478244  |
| 6  | C | 6 | 2.264759  | -0.428220 | -0.567130 |
| 7  | H | 1 | 2.433090  | -1.301430 | -1.197370 |
| 8  | H | 1 | 2.339621  | 0.495197  | -1.131610 |
| 9  | C | 6 | -1.185880 | 0.202950  | 0.650816  |
| 10 | H | 1 | -1.548620 | 1.082326  | 1.181365  |
| 11 | C | 6 | -2.169260 | -0.174260 | -0.471510 |
| 12 | H | 1 | -2.219700 | 0.647694  | -1.188440 |
| 13 | H | 1 | -1.781250 | -1.039930 | -1.011650 |
| 14 | H | 1 | -1.100730 | -0.622550 | 1.358140  |
| 15 | C | 6 | -3.566280 | -0.480870 | 0.063883  |
| 16 | H | 1 | -3.986960 | 0.379569  | 0.586873  |
| 17 | H | 1 | -4.247450 | -0.741850 | -0.746400 |
| 18 | H | 1 | -3.547270 | -1.317770 | 0.764185  |

**Table S1.6.** Optimised parameters of IM4n.

| Cartesian coordinate |      |            |           |           |          |
|----------------------|------|------------|-----------|-----------|----------|
| Center No.           | Atom | Atomic No. | X         | Y         | Z        |
| 1                    | C    | 6          | -0.438220 | -0.454470 | 0.694963 |
| 2                    | H    | 1          | -0.858360 | -1.006490 | 1.542316 |

|    |   |   |           |           |           |
|----|---|---|-----------|-----------|-----------|
| 3  | O | 8 | -0.959100 | 0.874238  | 0.721764  |
| 4  | O | 8 | -0.933990 | -1.003980 | -0.515720 |
| 5  | O | 8 | -2.27816  | -0.451420 | -0.532490 |
| 6  | C | 6 | -1.994380 | 0.902287  | -0.240840 |
| 7  | H | 1 | -2.905620 | 1.335600  | 0.171943  |
| 8  | H | 1 | -1.657430 | 1.435924  | -1.134450 |
| 9  | C | 6 | 1.759318  | 0.266266  | -0.438090 |
| 10 | H | 1 | 1.452318  | -0.161010 | -1.393480 |
| 11 | H | 1 | 1.414223  | 1.301354  | -0.433980 |
| 12 | C | 6 | 1.077134  | -0.491660 | 0.701489  |
| 13 | H | 1 | 1.378712  | -1.542420 | 0.698295  |
| 14 | H | 1 | 1.392545  | -0.085640 | 1.665950  |
| 15 | C | 6 | 3.282795  | 0.229508  | -0.322200 |
| 16 | H | 1 | 3.753131  | 0.774070  | -1.141220 |
| 17 | H | 1 | 3.621233  | 0.681283  | 0.612340  |
| 18 | H | 1 | 3.659312  | -0.794940 | -0.348150 |

**Table S1.7.** Optimised parameters of POZ-n.

| Cartesian coordinate |      |            |          |          |           |
|----------------------|------|------------|----------|----------|-----------|
| Center No.           | Atom | Atomic No. | X        | Y        | Z         |
| 1                    | C    | 6          | 1.551244 | 1.131635 | 0.022183  |
| 2                    | H    | 1          | 1.269137 | 1.646589 | -0.898480 |
| 3                    | C    | 6          | 0.356176 | 0.309631 | 0.581854  |

|    |   |   |           |           |           |
|----|---|---|-----------|-----------|-----------|
| 4  | O | 8 | 0.835269  | -1.041740 | 0.499031  |
| 5  | O | 8 | 2.560686  | 0.163833  | -0.228900 |
| 6  | C | 8 | 1.777207  | -0.985370 | -0.587390 |
| 7  | H | 1 | 1.965623  | 1.836042  | 0.740388  |
| 8  | C | 6 | -0.939310 | 0.524416  | -0.186120 |
| 9  | H | 1 | -0.773500 | 0.233854  | -1.227050 |
| 10 | C | 6 | -2.131250 | -0.23768  | 0.393300  |
| 11 | H | 1 | -2.287560 | 0.072928  | 1.430750  |
| 12 | H | 1 | -1.891060 | -1.302100 | 0.425058  |
| 13 | H | 1 | 0.215502  | 0.486670  | 1.649454  |
| 14 | C | 6 | -3.416800 | -0.022370 | -0.403720 |
| 15 | H | 1 | -4.249740 | -0.574450 | 0.032113  |
| 16 | H | 1 | -3.696570 | 1.032707  | -0.429910 |
| 17 | H | 1 | -3.301650 | -0.358400 | -1.435740 |
| 18 | H | 1 | -1.155810 | 1.598533  | -0.193620 |

**Table S1.8.** Optimised parameters of TS1n.

| Cartesian coordinate |      |            |           |           |           |
|----------------------|------|------------|-----------|-----------|-----------|
| Center No.           | Atom | Atomic No. | X         | Y         | Z         |
| 1                    | C    | 6          | -0.334940 | 0.531830  | -0.353330 |
| 2                    | H    | 1          | -0.226550 | 0.667085  | -1.450510 |
| 3                    | O    | 8          | -0.775910 | -0.842310 | -0.130690 |
| 4                    | O    | 8          | -1.156710 | 1.395504  | 0.154708  |

|    |   |   |           |           |           |
|----|---|---|-----------|-----------|-----------|
| 5  | O | 8 | -2.971420 | -0.186780 | -0.277270 |
| 6  | C | 6 | -2.065750 | -0.776590 | 0.398644  |
| 7  | C | 1 | 2.092212  | -0.366500 | -0.410940 |
| 8  | H | 1 | 1.712709  | -1.384040 | -0.316890 |
| 9  | H | 1 | 2.156918  | -0.155120 | -1.481450 |
| 10 | H | 1 | -2.339090 | -1.703070 | 0.927158  |
| 11 | H | 1 | -1.841530 | 0.005302  | 1.269423  |
| 12 | C | 6 | 1.118631  | 0.605800  | 0.241303  |
| 13 | H | 1 | 1.433851  | 1.640036  | 0.103982  |
| 14 | C | 6 | 3.486172  | -0.27267  | 0.214202  |
| 15 | H | 1 | 3.460315  | -0.51554  | 1.277666  |
| 16 | H | 1 | 4.174133  | -0.96785  | -0.267510 |
| 17 | H | 1 | 3.902305  | 0.730938  | 0.113097  |
| 18 | H | 1 | 1.021279  | 0.41975   | 1.311785  |

**Table S1.9.** Optimised parameters of TS2n.

| Cartesian coordinate |      |            |           |           |           |
|----------------------|------|------------|-----------|-----------|-----------|
| Center No.           | Atom | Atomic No. | X         | Y         | Z         |
| 1                    | C    | 6          | -0.334940 | 0.531830  | -0.353330 |
| 2                    | H    | 1          | -0.226550 | 0.667085  | -1.450510 |
| 3                    | O    | 8          | -0.775910 | -0.842310 | -0.130690 |
| 4                    | O    | 8          | -1.156710 | 1.395504  | 0.154708  |

|    |   |   |           |           |           |
|----|---|---|-----------|-----------|-----------|
| 5  | O | 8 | -2.971420 | -0.186780 | -0.277270 |
| 6  | C | 6 | -2.065750 | -0.776590 | 0.398644  |
| 7  | C | 6 | 2.092212  | -0.366500 | -0.410940 |
| 8  | H | 1 | 1.712709  | -1.384040 | -0.316890 |
| 9  | H | 1 | 2.156918  | -0.155120 | -1.481450 |
| 10 | H | 1 | -2.339090 | -1.703070 | 0.927158  |
| 11 | H | 1 | -1.841530 | 0.005302  | 1.269423  |
| 12 | C | 6 | 1.118631  | 0.605800  | 0.241303  |
| 13 | H | 1 | 1.433851  | 1.640036  | 0.103982  |
| 14 | C | 6 | 3.486172  | -0.272670 | 0.214202  |
| 15 | H | 1 | 3.460315  | -0.515540 | 1.277666  |
| 16 | H | 1 | 4.174133  | -0.967850 | -0.267510 |
| 17 | H | 1 | 3.902305  | 0.730938  | 0.113097  |
| 18 | H | 1 | 1.021279  | 0.419750  | 1.311785  |

**Table S1.10.** Optimised parameters of TS3n.

| Cartesian coordinate |      |            |          |           |           |
|----------------------|------|------------|----------|-----------|-----------|
| Center No.           | Atom | Atomic No. | X        | Y         | Z         |
| 1                    | C    | 6          | 0.228451 | 0.632804  | 0.659141  |
| 2                    | H    | 1          | 0.802839 | 0.673065  | 1.585833  |
| 3                    | O    | 8          | 1.139511 | -1.102240 | 0.339738  |
| 4                    | O    | 8          | 0.623592 | 1.326887  | -0.332080 |
| 5                    | O    | 8          | 2.747625 | 0.265896  | -0.431700 |

|    |   |   |           |           |           |
|----|---|---|-----------|-----------|-----------|
| 6  | C | 6 | 2.277362  | -0.874550 | -0.144490 |
| 7  | H | 1 | 1.740954  | 1.056428  | -0.406240 |
| 8  | H | 1 | 2.922950  | -1.742570 | -0.336520 |
| 9  | C | 6 | -1.202880 | 0.239545  | 0.789490  |
| 10 | H | 1 | -1.688390 | 1.070570  | 1.318985  |
| 11 | C | 6 | -1.922750 | -0.045930 | -0.527260 |
| 12 | H | 1 | -1.846750 | 0.827248  | -1.175390 |
| 13 | H | 1 | -1.402180 | -0.856540 | -1.039710 |
| 14 | H | 1 | -1.252170 | -0.615820 | 1.465587  |
| 15 | C | 6 | -3.389190 | -0.417660 | -0.315790 |
| 16 | H | 1 | -3.881330 | -0.624080 | -1.266170 |
| 17 | H | 1 | -3.488860 | -1.308080 | 0.307784  |
| 18 | H | 1 | -3.938870 | 0.390090  | 0.171652  |

**Table S1.11.** Optimised parameters of TS4n.

| Cartesian coordinate |      |            |           |           |           |
|----------------------|------|------------|-----------|-----------|-----------|
| Center No.           | Atom | Atomic No. | X         | Y         | Z         |
| 1                    | C    | 6          | -0.362140 | -0.306160 | 0.192778  |
| 2                    | H    | 1          | -1.021150 | -0.523210 | 1.155925  |
| 3                    | O    | 8          | -0.931080 | 0.937501  | -0.137140 |
| 4                    | O    | 8          | -0.686100 | -1.289890 | -0.556100 |
| 5                    | O    | 8          | -2.748130 | -0.400830 | 0.321051  |



|    |   |   |           |           |           |
|----|---|---|-----------|-----------|-----------|
| 6  | C | 6 | -2.370540 | 0.742409  | -0.168310 |
| 7  | H | 1 | -2.751230 | 1.611687  | 0.402734  |
| 8  | H | 1 | -2.710600 | 0.894638  | -1.214650 |
| 9  | C | 6 | 2.063659  | 0.100059  | -0.462780 |
| 10 | H | 1 | 1.988912  | -0.703660 | -1.196760 |
| 11 | H | 1 | 1.759286  | 1.018576  | -0.966810 |
| 12 | C | 6 | 1.093225  | -0.189380 | 0.689033  |
| 13 | H | 1 | 1.351304  | -1.128290 | 1.178094  |
| 14 | H | 1 | 1.122583  | 0.605278  | 1.434645  |
| 15 | C | 6 | 3.502207  | 0.229588  | 0.033766  |
| 16 | H | 1 | 4.180456  | 0.436576  | -0.794690 |
| 17 | H | 1 | 3.603841  | 1.043138  | 0.754306  |
| 18 | H | 1 | 3.840546  | -0.688110 | 0.517861  |

**Table S1.12.** Optimised parameters of TS5n.

| Cartesian coordinate |      |            |           |           |           |
|----------------------|------|------------|-----------|-----------|-----------|
| Center No.           | Atom | Atomic No. | X         | Y         | Z         |
| 1                    | C    | 6          | -0.232740 | -0.072590 | 0.423815  |
| 2                    | H    | 1          | -1.730860 | 1.126238  | 0.101431  |
| 3                    | O    | 8          | -0.958300 | -1.040280 | 0.051225  |
| 4                    | O    | 8          | -0.681360 | 1.112928  | 0.595864  |
| 5                    | O    | 8          | -2.678900 | 0.667965  | -0.596730 |

|    |   |   |           |           |           |
|----|---|---|-----------|-----------|-----------|
| 6  | C | 6 | -2.685570 | -0.544730 | -0.208180 |
| 7  | H | 1 | -2.942230 | -1.320240 | -0.931550 |
| 8  | H | 1 | -2.954960 | -0.784770 | 0.825952  |
| 9  | C | 6 | 2.075521  | 0.196612  | -0.534340 |
| 10 | H | 1 | 1.759542  | -0.319240 | -1.443480 |
| 11 | H | 1 | 1.869457  | 1.257014  | -0.686100 |
| 12 | C | 6 | 1.232722  | -0.311170 | 0.650067  |
| 13 | H | 1 | 1.394714  | -1.377300 | 0.801797  |
| 14 | H | 1 | 1.521378  | 0.221073  | 1.558074  |
| 15 | C | 6 | 3.570405  | -0.019160 | -0.309750 |
| 16 | H | 1 | 3.803787  | -1.076890 | -0.177020 |
| 17 | H | 1 | 4.148103  | 0.343572  | -1.159990 |
| 18 | H | 1 | 3.917521  | 0.511720  | 0.578288  |

**Table S1.13.** Optimised parameters of TS6n.

| Cartesian coordinate |      |            |           |           |           |
|----------------------|------|------------|-----------|-----------|-----------|
| Center No.           | Atom | Atomic No. | X         | Y         | Z         |
| 1                    | C    | 6          | -0.237730 | -0.352210 | 0.775000  |
| 2                    | H    | 1          | -0.897190 | -0.206910 | 1.619379  |
| 3                    | O    | 8          | -1.497420 | 1.412852  | 0.053586  |
| 4                    | O    | 8          | -0.668600 | -1.030590 | -0.198510 |
| 5                    | O    | 8          | -2.049070 | -1.197430 | -0.206200 |
| 6                    | C    | 6          | -2.516590 | 0.849913  | -0.362940 |

|    |   |   |           |           |           |
|----|---|---|-----------|-----------|-----------|
| 7  | H | 1 | -3.383070 | 0.679020  | 0.287651  |
| 8  | H | 1 | -2.699220 | 0.739713  | -1.437960 |
| 9  | C | 6 | 1.982333  | -0.165760 | -0.471380 |
| 10 | H | 1 | 1.969808  | -1.224040 | -0.736340 |
| 11 | H | 1 | 1.483629  | 0.360677  | -1.286090 |
| 12 | C | 6 | 1.185155  | 0.048922  | 0.814482  |
| 13 | H | 1 | 1.646865  | -0.478960 | 1.659028  |
| 14 | H | 1 | 1.185313  | 1.104615  | 1.104309  |
| 15 | C | 6 | 3.423989  | 0.320582  | -0.336680 |
| 16 | H | 1 | 3.975651  | 0.162544  | -1.262870 |
| 17 | H | 1 | 3.463360  | 1.386536  | -0.106070 |
| 18 | H | 1 | 3.952540  | -0.210590 | 0.457176  |

**Table S1.14.** Optimised parameters of TS7n..

| Cartesian coordinate |      |            |          |           |           |
|----------------------|------|------------|----------|-----------|-----------|
| Center No.           | Atom | Atomic No. | X        | Y         | Z         |
| 1                    | C    | 6          | 0.316547 | 0.784178  | 0.580043  |
| 2                    | H    | 1          | 0.855642 | 1.027268  | 1.497550  |
| 3                    | O    | 8          | 1.128545 | -1.073970 | 0.697044  |
| 4                    | O    | 8          | 0.768191 | 1.173629  | -0.522010 |
| 5                    | O    | 8          | 2.509356 | 0.332482  | -0.402340 |
| 6                    | C    | 6          | 1.968969 | -0.891030 | -0.263330 |
| 7                    | H    | 1          | 3.097686 | -1.126080 | -0.017240 |

|    |   |   |           |           |           |
|----|---|---|-----------|-----------|-----------|
| 8  | H | 1 | 1.780389  | -1.428130 | -1.211280 |
| 9  | C | 6 | -1.827920 | -0.128530 | -0.504350 |
| 10 | H | 1 | -1.710420 | 0.560474  | -1.341160 |
| 11 | H | 1 | -1.314540 | -1.049320 | -0.785160 |
| 12 | C | 6 | -1.148250 | 0.452813  | 0.732217  |
| 13 | H | 1 | -1.624870 | 1.398603  | 1.019003  |
| 14 | H | 1 | -1.245180 | -0.211460 | 1.591454  |
| 15 | C | 6 | -3.310090 | -0.412360 | -0.264930 |
| 16 | H | 1 | -3.777180 | -0.831230 | -1.156370 |
| 17 | H | 1 | -3.452410 | -1.125930 | 0.548704  |
| 18 | H | 1 | -3.853430 | 0.498242  | -0.004920 |

**Table S1.15.** Optimised parameters of TS8n.

| Cartesian coordinate |      |            |          |           |           |
|----------------------|------|------------|----------|-----------|-----------|
| Center No.           | Atom | Atomic No. | X        | Y         | Z         |
| 1                    | C    | 6          | 0.363073 | 0.384434  | 0.482282  |
| 2                    | H    | 1          | 0.396043 | 1.202309  | 1.404323  |
| 3                    | O    | 8          | 0.814003 | -0.811320 | 0.755984  |
| 4                    | O    | 8          | 1.317478 | 1.297850  | 0.295975  |
| 5                    | O    | 8          | 2.219862 | 0.070896  | -1.021160 |
| 6                    | C    | 6          | 2.245163 | -0.875520 | -0.158980 |
| 7                    | H    | 1          | 2.972697 | -0.842100 | 0.657937  |
| 8                    | H    | 1          | 2.069869 | -1.879070 | -0.563580 |

|    |   |   |           |           |           |
|----|---|---|-----------|-----------|-----------|
| 9  | C | 6 | -2.099300 | -0.293500 | 0.370913  |
| 10 | H | 1 | -1.788440 | -1.334330 | 0.466950  |
| 11 | H | 1 | -2.284510 | 0.066789  | 1.386658  |
| 12 | C | 6 | -0.961070 | 0.513252  | -0.254410 |
| 13 | H | 1 | -0.756870 | 0.164673  | -1.271270 |
| 14 | H | 1 | -1.218210 | 1.570839  | -0.322090 |
| 15 | C | 6 | -3.387720 | -0.205150 | -0.445510 |
| 16 | H | 1 | -3.242290 | -0.593870 | -1.454840 |
| 17 | H | 1 | -4.187050 | -0.782110 | 0.019545  |
| 18 | H | 1 | -3.732830 | 0.826360  | -0.535860 |

**Table S1.16.** Optimised parameters of TS9n.

| Cartesian coordinate |      |            |           |           |           |
|----------------------|------|------------|-----------|-----------|-----------|
| Center No.           | Atom | Atomic No. | X         | Y         | Z         |
| 1                    | O    | 8          | 0.700432  | -1.231960 | 0.077913  |
| 2                    | C    | 6          | 0.202230  | -0.142100 | 0.506319  |
| 3                    | C    | 6          | 1.486717  | 1.133191  | -0.004340 |
| 4                    | O    | 8          | 2.582739  | 0.425873  | 0.220914  |
| 5                    | O    | 8          | 2.621729  | -0.635050 | -0.559930 |
| 6                    | H    | 1          | 1.426475  | 2.003166  | 0.638025  |
| 7                    | C    | 6          | -1.062920 | 0.407851  | -0.162920 |
| 8                    | H    | 1          | -0.952680 | 0.308744  | -1.244450 |
| 9                    | C    | 6          | -2.303650 | -0.359970 | 0.307745  |

|    |   |   |           |           |           |
|----|---|---|-----------|-----------|-----------|
| 10 | H | 1 | -2.175810 | -1.414530 | 0.056906  |
| 11 | H | 1 | -2.369130 | -0.307950 | 1.398113  |
| 12 | H | 1 | 1.198381  | 1.226978  | -1.044010 |
| 13 | H | 1 | 0.237193  | 0.022517  | 1.598146  |
| 14 | H | 1 | -1.181430 | 1.470804  | 0.070165  |
| 15 | C | 6 | -3.594860 | 0.174763  | -0.309520 |
| 16 | H | 1 | -4.459620 | -0.390770 | 0.038602  |
| 17 | H | 1 | -3.757440 | 1.222224  | -0.048110 |
| 18 | H | 1 | -3.570280 | 0.105468  | -1.398350 |

**Table S1.16.** Optimised parameters of TS10n.

| Cartesian coordinate |      |            |           |           |           |
|----------------------|------|------------|-----------|-----------|-----------|
| Center No.           | Atom | Atomic No. | X         | Y         | Z         |
| 1                    | O    | 8          | 0.700432  | -1.231960 | 0.077913  |
| 2                    | C    | 6          | 0.202230  | -0.142100 | 0.506319  |
| 3                    | C    | 6          | 1.486717  | 1.133191  | -0.004340 |
| 4                    | O    | 8          | 2.582739  | 0.425873  | 0.220914  |
| 5                    | O    | 8          | 2.621729  | -0.635050 | -0.559930 |
| 6                    | H    | 1          | 1.426475  | 2.003166  | 0.638025  |
| 7                    | C    | 6          | -1.062920 | 0.407851  | -0.162920 |
| 8                    | H    | 1          | -0.952680 | 0.308744  | -1.244450 |
| 9                    | C    | 6          | -2.303650 | -0.359970 | 0.307745  |
| 10                   | H    | 1          | -2.175810 | -1.414530 | 0.056906  |

|    |   |   |           |           |           |
|----|---|---|-----------|-----------|-----------|
| 11 | H | 1 | -2.369130 | -0.307950 | 1.398113  |
| 12 | H | 1 | 1.198381  | 1.226978  | -1.044010 |
| 13 | H | 1 | 0.237193  | 0.022517  | 1.598146  |
| 14 | H | 1 | -1.181430 | 1.470804  | 0.070165  |
| 15 | C | 6 | -3.594860 | 0.174763  | -0.30952  |
| 16 | H | 1 | -4.459620 | -0.390770 | 0.038602  |
| 17 | H | 1 | -3.757440 | 1.222224  | -0.048110 |
| 18 | H | 1 | -3.570280 | 0.105468  | -1.398350 |

**Table S1.17.** Optimised parameters of IM1i.

| Cartesian coordinate |      |            |           |           |           |
|----------------------|------|------------|-----------|-----------|-----------|
| Center No.           | Atom | Atomic No. | X         | Y         | Z         |
| 1                    | C    | 6          | 0.432120  | -0.153590 | 0.766290  |
| 2                    | H    | 1          | 0.220270  | -1.102160 | 1.292220  |
| 3                    | O    | 8          | -0.142570 | 0.863870  | 1.091870  |
| 4                    | O    | 8          | -1.555850 | -1.053230 | -0.823080 |
| 5                    | O    | 8          | -2.529830 | -0.537860 | -0.018220 |
| 6                    | C    | 6          | -2.626140 | 0.704870  | 0.068660  |
| 7                    | C    | 6          | 2.818630  | -0.702340 | 0.417010  |
| 8                    | H    | 1          | 3.592210  | -0.899260 | -0.324770 |
| 9                    | H    | 1          | 3.190860  | 0.066980  | 1.09555   |
| 10                   | H    | 1          | 2.668790  | -1.617310 | 0.991990  |
| 11                   | H    | 1          | -3.38830  | 1.061460  | 0.747850  |

|    |   |   |           |           |           |
|----|---|---|-----------|-----------|-----------|
| 12 | H | 1 | -1.980360 | 1.341310  | -0.519110 |
| 13 | C | 6 | 1.521050  | -0.245750 | -0.276010 |
| 14 | H | 1 | 1.203920  | -1.048600 | -0.948710 |
| 15 | C | 6 | 1.700490  | 1.045770  | -1.065400 |
| 16 | H | 1 | 2.483170  | 0.927300  | -1.815150 |
| 17 | H | 1 | 0.780420  | 1.323000  | -1.577940 |
| 18 | H | 1 | 1.978160  | 1.871260  | -0.409780 |

**Table S1.18.** Optimised parameters of SOZ-i.

| Cartesian coordinate |      |            |           |           |           |
|----------------------|------|------------|-----------|-----------|-----------|
| Center No.           | Atom | Atomic No. | X         | Y         | Z         |
| 1                    | C    | 6          | -0.037670 | -0.276280 | -0.548260 |
| 2                    | H    | 1          | -0.094800 | -1.000840 | -1.368100 |
| 3                    | O    | 8          | -0.568460 | -0.887350 | 0.627040  |
| 4                    | O    | 8          | -0.915210 | 0.805780  | -0.814100 |
| 5                    | O    | 8          | -2.196980 | 0.211170  | -0.471280 |
| 6                    | C    | 6          | -1.874840 | -0.367890 | 0.776330  |
| 7                    | C    | 6          | 2.344060  | -0.944410 | -0.216640 |
| 8                    | H    | 1          | 3.374120  | -0.592650 | -0.161760 |
| 9                    | H    | 1          | 2.129660  | -1.504650 | 0.693780  |
| 10                   | H    | 1          | 2.27048   | -1.63127  | -1.06102  |
| 11                   | H    | 1          | -2.59693  | -1.16524  | 0.95291   |
| 12                   | H    | 1          | -1.89005  | 0.38075   | 1.5739    |



|    |   |   |         |         |          |
|----|---|---|---------|---------|----------|
| 13 | C | 6 | 1.38449 | 0.24142 | -0.36504 |
| 14 | H | 1 | 1.62391 | 0.76091 | -1.29807 |
| 15 | C | 6 | 1.51227 | 1.22851 | 0.79691  |
| 16 | H | 1 | 2.53464 | 1.60242 | 0.85685  |
| 17 | H | 1 | 0.84764 | 2.08171 | 0.67399  |
| 18 | H | 1 | 1.27669 | 0.74395 | 1.74443  |

**Table S1.19.** Optimised parameters of IM2i.

| Cartesian coordinate |      |            |           |           |           |
|----------------------|------|------------|-----------|-----------|-----------|
| Center No.           | Atom | Atomic No. | X         | Y         | Z         |
| 1                    | C    | 6          | -0.041720 | 0.230368  | -0.502100 |
| 2                    | H    | 1          | -0.379680 | -0.240950 | -1.427980 |
| 3                    | O    | 8          | -0.655950 | -0.550990 | 0.582346  |
| 4                    | O    | 8          | -0.441760 | 1.555025  | -0.437720 |
| 5                    | O    | 8          | -2.709720 | -0.137970 | -0.262680 |
| 6                    | C    | 6          | -1.981570 | -0.653720 | 0.547942  |
| 7                    | C    | 6          | 1.946254  | -1.315700 | -0.541800 |
| 8                    | H    | 1          | 3.035338  | -1.356910 | -0.533980 |
| 9                    | H    | 1          | 1.582112  | -1.960590 | 0.257996  |
| 10                   | H    | 1          | 1.605766  | -1.731090 | -1.492000 |
| 11                   | H    | 1          | -1.375110 | 1.593485  | -0.681330 |
| 12                   | H    | 1          | -2.332050 | -1.280490 | 1.376777  |
| 13                   | C    | 6          | 1.469557  | 0.126415  | -0.350410 |

|    |   |   |          |          |           |
|----|---|---|----------|----------|-----------|
| 14 | H | 1 | 1.861780 | 0.730616 | -1.173290 |
| 15 | C | 6 | 1.967725 | 0.727615 | 0.966780  |
| 16 | H | 1 | 3.057789 | 0.72592  | 0.988183  |
| 17 | H | 1 | 1.626716 | 1.753934 | 1.087767  |
| 18 | H | 1 | 1.615265 | 0.147616 | 1.819798  |

**Table S1.20.** Optimised parameters of IM3i.

| Cartesian coordinate |      |            |           |           |           |
|----------------------|------|------------|-----------|-----------|-----------|
| Center No.           | Atom | Atomic No. | X         | Y         | Z         |
| 1                    | C    | 6          | -0.144120 | -0.532700 | -0.370330 |
| 2                    | H    | 1          | 2.681025  | 1.582937  | 0.321487  |
| 3                    | O    | 8          | 0.619882  | 0.040875  | 0.601206  |
| 4                    | O    | 8          | 0.287136  | -1.308720 | -1.180560 |
| 5                    | O    | 8          | 2.721380  | 0.741821  | -0.143680 |
| 6                    | C    | 6          | 2.031282  | -0.223340 | 0.583195  |
| 7                    | C    | 6          | -1.706350 | 1.428014  | -0.570120 |
| 8                    | H    | 1          | -2.757210 | 1.717404  | -0.598570 |
| 9                    | H    | 1          | -1.214300 | 2.012851  | 0.206292  |
| 10                   | H    | 1          | -1.260050 | 1.688999  | -1.529840 |
| 11                   | H    | 1          | 2.319768  | -0.236480 | 1.634155  |
| 12                   | H    | 1          | 2.217060  | -1.178470 | 0.103647  |
| 13                   | C    | 6          | -1.588890 | -0.076260 | -0.285410 |

|    |   |   |           |           |           |
|----|---|---|-----------|-----------|-----------|
| 14 | H | 1 | -2.096330 | -0.625470 | -1.078310 |
| 15 | C | 6 | -2.218940 | -0.450360 | 1.063179  |
| 16 | H | 1 | -3.276970 | -0.186660 | 1.062131  |
| 17 | H | 1 | -2.141190 | -1.520370 | 1.257663  |
| 18 | H | 1 | -1.736830 | 0.081346  | 1.882555  |

**Table S1.21.** Optimised parameters of IM4i.

| Cartesian coordinate |      |            |           |           |           |
|----------------------|------|------------|-----------|-----------|-----------|
| Center No.           | Atom | Atomic No. | X         | Y         | Z         |
| 1                    | C    | 6          | -0.190120 | -0.335510 | -0.684410 |
| 2                    | H    | 1          | 0.305038  | 0.166756  | -1.507110 |
| 3                    | O    | 8          | 1.351705  | 1.415165  | 0.333345  |
| 4                    | O    | 8          | 0.473128  | -1.184520 | -0.041800 |
| 5                    | O    | 8          | 1.819173  | -1.289430 | -0.362180 |
| 6                    | 6    | 6          | 2.393280  | 0.784515  | 0.422447  |
| 7                    | 6    | 6          | -1.904430 | 1.405165  | -0.321560 |
| 8                    | H    | 1          | -2.974330 | 1.571261  | -0.203250 |
| 9                    | H    | 1          | -1.377970 | 1.865132  | 0.512101  |
| 10                   | H    | 1          | -1.581270 | 1.901769  | -1.235980 |
| 11                   | H    | 1          | 3.147090  | 0.793854  | -0.376420 |
| 12                   | H    | 1          | 2.692412  | 0.295076  | 1.358751  |
| 13                   | C    | 6          | -1.624150 | -0.109860 | -0.367970 |

|    |   |   |           |           |           |
|----|---|---|-----------|-----------|-----------|
| 14 | H | 1 | -2.164980 | -0.509800 | -1.238310 |
| 15 | C | 6 | -2.097000 | -0.838540 | 0.889549  |
| 16 | H | 1 | -3.162840 | -0.666730 | 1.033271  |
| 17 | H | 1 | -1.929660 | -1.912220 | 0.824062  |
| 18 | H | 1 | -1.571050 | -0.469530 | 1.769672  |

**Table S1.22.** Optimised parameters of POZ-i.

| Cartesian coordinate |      |            |           |           |           |
|----------------------|------|------------|-----------|-----------|-----------|
| Center No.           | Atom | Atomic No. | X         | Y         | Z         |
| 1                    | C    | 6          | 1.018819  | 1.165953  | 0.128235  |
| 2                    | H    | 1          | 0.717467  | 1.643656  | -0.805880 |
| 3                    | C    | 6          | 0.021506  | 0.039520  | 0.522388  |
| 4                    | O    | 8          | 0.819330  | -1.147340 | 0.388265  |
| 5                    | O    | 8          | 2.260526  | 0.497029  | -0.032610 |
| 6                    | O    | 8          | 1.833526  | -0.765940 | -0.560860 |
| 7                    | H    | 1          | 1.163591  | 1.911436  | 0.906954  |
| 8                    | C    | 6          | -1.253300 | 0.004247  | -0.323750 |
| 9                    | H    | 1          | -0.941000 | -0.045370 | -1.371410 |
| 10                   | C    | 6          | -2.090290 | -1.236940 | -0.005490 |
| 11                   | H    | 1          | -2.430140 | -1.223740 | 1.032987  |
| 12                   | H    | 1          | -2.975340 | -1.275520 | -0.641380 |
| 13                   | H    | 1          | -1.519480 | -2.150450 | -0.161540 |
| 14                   | H    | 1          | -0.230000 | 0.086642  | 1.584536  |

|    |   |   |           |          |           |
|----|---|---|-----------|----------|-----------|
| 15 | C | 6 | -2.068290 | 1.285367 | -0.110900 |
| 16 | H | 1 | -2.382190 | 1.378687 | 0.931480  |
| 17 | H | 1 | -1.510990 | 2.185535 | -0.373590 |
| 18 | H | 1 | -2.969640 | 1.270187 | -0.723480 |

**Table S1.23.** Optimised parameters of TS1i.

| Cartesian coordinate |      |            |           |           |           |
|----------------------|------|------------|-----------|-----------|-----------|
| Center No.           | Atom | Atomic No. | X         | Y         | Z         |
| 1                    | C    | 6          | 0.219230  | -0.728670 | 0.013050  |
| 2                    | H    | 1          | 0.070360  | -1.637270 | -0.585720 |
| 3                    | O    | 8          | -0.338140 | -0.632520 | 1.121610  |
| 4                    | O    | 8          | -1.243150 | 0.210600  | -1.248270 |
| 5                    | O    | 8          | -2.313380 | -0.187410 | -0.464870 |
| 6                    | C    | 6          | -2.253410 | 0.265900  | 0.710420  |
| 7                    | C    | 6          | 2.682270  | -0.707300 | -0.081560 |
| 8                    | H    | 1          | 3.565490  | -0.186620 | -0.452100 |
| 9                    | H    | 1          | 2.798260  | -0.849220 | 0.993840  |
| 10                   | H    | 1          | 2.654480  | -1.691580 | -0.551480 |
| 11                   | H    | 1          | -2.977310 | -0.151930 | 1.397910  |
| 12                   | H    | 1          | -1.677920 | 1.150710  | 0.927830  |
| 13                   | C    | 6          | 1.413570  | 0.109810  | -0.393390 |
| 14                   | H    | 1          | 1.352160  | 0.232800  | -1.477260 |
| 15                   | C    | 6          | 1.440960  | 1.480370  | 0.276410  |

|    |   |   |          |          |           |
|----|---|---|----------|----------|-----------|
| 16 | H | 1 | 2.329620 | 2.033530 | -0.029180 |
| 17 | H | 1 | 0.568330 | 2.069380 | -0.003090 |
| 18 | H | 1 | 1.458260 | 1.384280 | 1.361950  |

**Table S1.24.** Optimised parameters of TS2i.

| Cartesian coordinate |      |            |           |           |           |
|----------------------|------|------------|-----------|-----------|-----------|
| Center No.           | Atom | Atomic No. | X         | Y         | Z         |
| 1                    | C    | 6          | -0.028110 | -0.070040 | -0.710270 |
| 2                    | H    | 1          | 0.030570  | -0.762070 | -1.576080 |
| 3                    | O    | 8          | -0.584070 | -0.815080 | 0.406210  |
| 4                    | O    | 8          | -0.703150 | 0.994010  | -0.982170 |
| 5                    | O    | 8          | -2.724540 | -0.161980 | -0.125990 |
| 6                    | C    | 6          | -1.800250 | -0.213250 | 0.748840  |
| 7                    | C    | 6          | 2.235050  | -1.123620 | -0.114600 |
| 8                    | H    | 1          | 3.295370  | -0.93350  | 0.061200  |
| 9                    | H    | 1          | 1.840030  | -1.652750 | 0.751350  |
| 10                   | H    | 1          | 2.154360  | -1.780610 | -0.981160 |
| 11                   | H    | 1          | -2.086210 | -0.447060 | 1.786510  |
| 12                   | H    | 1          | -1.412560 | 0.912310  | 0.791140  |
| 13                   | C    | 6          | 1.512370  | 0.197930  | -0.334670 |
| 14                   | H    | 1          | 1.883760  | 0.681990  | -1.239200 |
| 15                   | C    | 6          | 1.636550  | 1.153150  | 0.842690  |

|    |   |   |          |          |          |
|----|---|---|----------|----------|----------|
| 16 | H | 1 | 1.224830 | 0.720060 | 1.754450 |
| 17 | H | 1 | 2.69219  | 1.360180 | 1.026960 |
| 18 | H | 1 | 1.137910 | 2.100710 | 0.648570 |

**Table S1.25.** Optimised parameters of TS3i.

| Cartesian coordinate |      |            |           |           |           |
|----------------------|------|------------|-----------|-----------|-----------|
| Center No.           | Atom | Atomic No. | X         | Y         | Z         |
| 1                    | C    | 6          | 0.124280  | 0.350560  | -0.694050 |
| 2                    | H    | 1          | -0.186500 | -0.256100 | -1.546810 |
| 3                    | O    | 8          | -0.806440 | -1.011380 | 0.422770  |
| 4                    | O    | 8          | -0.537110 | 1.403760  | -0.424540 |
| 5                    | O    | 8          | -2.588930 | 0.241030  | -0.135340 |
| 6                    | C    | 6          | -2.035880 | -0.748260 | 0.429740  |
| 7                    | C    | 6          | 2.104090  | -1.180690 | -0.501240 |
| 8                    | H    | 1          | 1.646340  | -1.876040 | 0.199960  |
| 9                    | H    | 1          | 1.907510  | -1.541060 | -1.512160 |
| 10                   | H    | 1          | 3.182430  | -1.197220 | -0.347300 |
| 11                   | H    | 1          | -1.626950 | 1.033510  | -0.428580 |
| 12                   | H    | 1          | -2.691720 | -1.439830 | 0.976490  |
| 13                   | C    | 6          | 1.563360  | 0.235590  | -0.291000 |
| 14                   | H    | 1          | 2.062570  | 0.899710  | -1.012560 |
| 15                   | C    | 6          | 1.825120  | 0.775340  | 1.116230  |

|    |   |   |          |          |          |
|----|---|---|----------|----------|----------|
| 16 | H | 1 | 2.895810 | 0.790660 | 1.318070 |
| 17 | H | 1 | 1.437890 | 1.785290 | 1.231890 |
| 18 | H | 1 | 1.346620 | 0.138490 | 1.859890 |

**Table S1.26.** Optimised parameters of TS4i.

| Cartesian coordinate |      |            |           |           |           |
|----------------------|------|------------|-----------|-----------|-----------|
| Center No.           | Atom | Atomic No. | X         | Y         | Z         |
| 1                    | C    | 6          | 0.079610  | -0.288500 | -0.266460 |
| 2                    | H    | 1          | 0.591562  | 0.347175  | -1.127730 |
| 3                    | O    | 8          | 0.642957  | 0.394550  | 0.826483  |
| 4                    | O    | 8          | 0.542711  | -1.453630 | -0.499310 |
| 5                    | O    | 8          | 2.415899  | 0.082824  | -0.610040 |
| 6                    | C    | 6          | 2.075386  | 0.452971  | 0.588618  |
| 7                    | C    | 6          | -1.800030 | 1.431240  | -0.412570 |
| 8                    | H    | 1          | -2.877640 | 1.558550  | -0.523320 |
| 9                    | H    | 1          | -1.501590 | 1.899475  | 0.524555  |
| 10                   | H    | 1          | -1.314060 | 1.964915  | -1.229850 |
| 11                   | H    | 1          | 2.317726  | 1.510768  | 0.809899  |
| 12                   | H    | 1          | 2.577701  | -0.144850 | 1.378367  |
| 13                   | C    | 6          | -1.456600 | -0.054260 | -0.421490 |
| 14                   | H    | 1          | -1.703430 | -0.487180 | -1.391120 |
| 15                   | C    | 6          | -2.191130 | -0.835140 | 0.6754650 |



|    |   |   |           |           |           |
|----|---|---|-----------|-----------|-----------|
| 16 | H | 1 | -3.268190 | -0.730660 | 0.5374670 |
| 17 | H | 1 | -1.939880 | -1.893610 | 0.6392040 |
| 18 | H | 1 | -1.938200 | -0.452430 | 1.6640050 |

**Table S1.27.** Optimised parameters of TS5i.

| Cartesian coordinate |      |            |           |           |           |
|----------------------|------|------------|-----------|-----------|-----------|
| Center No.           | Atom | Atomic No. | X         | Y         | Z         |
| 1                    | C    | 6          | 0.044660  | -0.077830 | -0.144420 |
| 2                    | H    | 1          | -1.430990 | -0.349680 | 1.093255  |
| 3                    | O    | 8          | -0.794130 | 0.241359  | -1.036070 |
| 4                    | O    | 8          | -0.294040 | -0.546580 | 0.996483  |
| 5                    | O    | 8          | -2.547370 | 0.144105  | 0.759230  |
| 6                    | C    | 6          | -2.509510 | -0.035400 | -0.500510 |
| 7                    | C    | 6          | 2.314601  | -1.148720 | -0.116640 |
| 8                    | H    | 1          | 3.366159  | -0.989990 | -0.355390 |
| 9                    | H    | 1          | 2.237046  | -1.406520 | 0.938380  |
| 10                   | H    | 1          | 1.961867  | -1.998800 | -0.701090 |
| 11                   | H    | 1          | -2.974870 | 0.711153  | -1.146090 |
| 12                   | H    | 1          | -2.516610 | -1.052200 | -0.907580 |
| 13                   | C    | 6          | 1.515907  | 0.122272  | -0.429800 |
| 14                   | H    | 1          | 1.590688  | 0.348528  | -1.493460 |
| 15                   | C    | 6          | 2.027925  | 1.329401  | 0.373912  |

|    |   |   |          |          |          |
|----|---|---|----------|----------|----------|
| 16 | H | 1 | 3.076720 | 1.509807 | 0.138508 |
| 17 | H | 1 | 1.468458 | 2.234238 | 0.136864 |
| 18 | H | 1 | 1.944376 | 1.144066 | 1.444282 |

**Table S1.28.** Optimised parameters of TS6i.

| Cartesian coordinate |      |            |           |           |           |
|----------------------|------|------------|-----------|-----------|-----------|
| Center No.           | Atom | Atomic No. | X         | Y         | Z         |
| 1                    | C    | 6          | -0.113690 | -0.283810 | -0.679490 |
| 2                    | H    | 1          | 0.322494  | 0.268889  | -1.500810 |
| 3                    | O    | 8          | 1.084765  | 1.327702  | 0.438534  |
| 4                    | O    | 8          | 0.600327  | -1.159110 | -0.116140 |
| 5                    | O    | 8          | 1.958103  | -1.053870 | -0.400250 |
| 6                    | C    | 6          | 2.221414  | 0.837584  | 0.440458  |
| 7                    | C    | 6          | -2.009290 | 1.277757  | -0.385850 |
| 8                    | H    | 1          | -3.091170 | 1.330871  | -0.272330 |
| 9                    | H    | 1          | -1.538280 | 1.831371  | 0.423178  |
| 10                   | H    | 1          | -1.742580 | 1.762008  | -1.325130 |
| 11                   | H    | 1          | 2.943970  | 1.067056  | -0.352270 |
| 12                   | H    | 1          | 2.639683  | 0.392818  | 1.350576  |
| 13                   | C    | 6          | -1.563310 | -0.194780 | -0.360100 |
| 14                   | H    | 1          | -2.058160 | -0.697660 | -1.204550 |
| 15                   | C    | 6          | -1.947440 | -0.908290 | 0.936591  |

|    |   |   |           |           |          |
|----|---|---|-----------|-----------|----------|
| 16 | H | 1 | -3.023390 | -0.835940 | 1.089742 |
| 17 | H | 1 | -1.675690 | -1.962050 | 0.917071 |
| 18 | H | 1 | -1.448540 | -0.445980 | 1.787776 |

**Table S1.29.** Optimised parameters of TS7i.

| Cartesian coordinate |      |            |           |           |           |
|----------------------|------|------------|-----------|-----------|-----------|
| Center No.           | Atom | Atomic No. | X         | Y         | Z         |
| 1                    | C    | 6          | -0.065370 | -0.277810 | -0.781400 |
| 2                    | H    | 1          | 0.152083  | 0.372505  | -1.631600 |
| 3                    | O    | 8          | 0.759356  | 1.171366  | 0.408249  |
| 4                    | O    | 8          | 0.694031  | -1.241160 | -0.532770 |
| 5                    | O    | 8          | 2.344698  | -0.249320 | -0.345810 |
| 6                    | C    | 6          | 1.841590  | 0.511625  | 0.642383  |
| 7                    | C    | 6          | -2.155180 | 1.084381  | -0.435170 |
| 8                    | H    | 1          | -3.228140 | 1.009390  | -0.258110 |
| 9                    | H    | 1          | -1.730170 | 1.782321  | 0.283301  |
| 10                   | H    | 1          | -2.011910 | 1.498206  | -1.434240 |
| 11                   | H    | 1          | 2.850175  | 1.082594  | 0.428989  |
| 12                   | H    | 1          | 1.973709  | 0.099158  | 1.659838  |
| 13                   | C    | 6          | -1.505260 | -0.293210 | -0.296300 |
| 14                   | H    | 1          | -1.987660 | -0.967470 | -1.017700 |
| 15                   | C    | 6          | -1.662420 | -0.893200 | 1.099878  |

|    |   |   |           |           |          |
|----|---|---|-----------|-----------|----------|
| 16 | H | 1 | -2.719910 | -0.995500 | 1.343210 |
| 17 | H | 1 | -1.199290 | -1.875400 | 1.167814 |
| 18 | H | 1 | -1.203760 | -0.243650 | 1.844802 |

**Table S1.30.** Optimised parameters of TS8i.

| Cartesian coordinate |      |            |           |           |           |
|----------------------|------|------------|-----------|-----------|-----------|
| Center No.           | Atom | Atomic No. | X         | Y         | Z         |
| 1                    | C    | 6          | -0.039940 | 0.005208  | 0.480148  |
| 2                    | H    | 1          | 0.218716  | -0.501320 | 1.578419  |
| 3                    | O    | 8          | -0.808540 | 1.062325  | 0.484319  |
| 4                    | O    | 8          | -0.695000 | -1.140060 | 0.669308  |
| 5                    | O    | 8          | -1.985670 | -0.630080 | -0.793900 |
| 6                    | C    | 6          | -2.235790 | 0.483441  | -0.209900 |
| 7                    | H    | 1          | -2.879850 | 0.493816  | 0.675224  |
| 8                    | H    | 1          | -2.388630 | 1.335628  | -0.882460 |
| 9                    | C    | 6          | 1.238441  | 0.038144  | -0.364900 |
| 10                   | H    | 1          | 0.852633  | 0.042021  | -1.390200 |
| 11                   | C    | 6          | 2.019675  | 1.331952  | -0.125730 |
| 12                   | H    | 1          | 2.420512  | 1.365784  | 0.889483  |
| 13                   | H    | 1          | 2.861575  | 1.391814  | -0.814990 |
| 14                   | H    | 1          | 1.393568  | 2.209441  | -0.271410 |
| 15                   | C    | 6          | 2.095516  | -1.20977  | -0.165400 |

|    |   |   |          |           |           |
|----|---|---|----------|-----------|-----------|
| 16 | H | 1 | 2.946508 | -1.189600 | -0.845640 |
| 17 | H | 1 | 2.491764 | -1.259400 | 0.852028  |
| 18 | H | 1 | 1.529469 | -2.119480 | -0.353550 |

**Table S1.31.** Optimised parameters of TS9i.

| Cartesian coordinate |      |            |           |           |           |
|----------------------|------|------------|-----------|-----------|-----------|
| Center No.           | Atom | Atomic No. | X         | Y         | Z         |
| 1                    | O    | 8          | 0.565659  | -1.331790 | 0.187520  |
| 2                    | C    | 6          | -0.088710 | -0.277720 | 0.466012  |
| 3                    | C    | 6          | 1.112061  | 1.096477  | -0.059830 |
| 4                    | O    | 8          | 2.253277  | 0.507832  | 0.255888  |
| 5                    | O    | 8          | 2.421931  | -0.594860 | -0.445230 |
| 6                    | H    | 1          | 0.950466  | 1.995010  | 0.521237  |
| 7                    | C    | 6          | -1.372310 | 0.030825  | -0.335560 |
| 8                    | H    | 1          | -1.110360 | -0.025850 | -1.395080 |
| 9                    | C    | 6          | -2.389730 | -1.078880 | -0.035560 |
| 10                   | H    | 1          | -3.304340 | -0.923060 | -0.609260 |
| 11                   | H    | 1          | -1.981220 | -2.055470 | -0.288350 |
| 12                   | H    | 1          | -2.658840 | -1.087300 | 1.023102  |
| 13                   | H    | 1          | 0.862590  | 1.097682  | -1.113890 |
| 14                   | H    | 1          | -0.160150 | -0.007220 | 1.536244  |
| 15                   | C    | 6          | -1.955720 | 1.407802  | -0.013760 |

|    |   |   |           |          |           |
|----|---|---|-----------|----------|-----------|
| 16 | H | 1 | -1.316010 | 2.228411 | -0.340920 |
| 17 | H | 1 | -2.919390 | 1.537420 | -0.506400 |
| 18 | H | 1 | -2.123220 | 1.519946 | 1.060030  |

**Table S1.32.** Optimised parameters of TS10i.

| Cartesian coordinate |      |            |           |           |           |
|----------------------|------|------------|-----------|-----------|-----------|
| Center No.           | Atom | Atomic No. | X         | Y         | Z         |
| 1                    | O    | 8          | -1.407510 | 1.146612  | 0.474345  |
| 2                    | C    | 6          | 0.287874  | -0.464520 | 0.694941  |
| 3                    | C    | 6          | -0.523220 | -1.527740 | 0.419682  |
| 4                    | O    | 8          | -2.384400 | -0.565370 | -0.373030 |
| 5                    | O    | 8          | -1.919900 | 0.616845  | -0.581880 |
| 6                    | C    | 6          | 1.302615  | 0.075279  | -0.277460 |
| 7                    | H    | 1          | 0.835224  | 0.089052  | -1.268140 |
| 8                    | H    | 1          | -1.119490 | -1.987070 | 1.191593  |
| 9                    | C    | 6          | 1.749519  | 1.495856  | 0.075313  |
| 10                   | H    | 1          | 2.223953  | 1.518584  | 1.059136  |
| 11                   | H    | 1          | 2.477185  | 1.861630  | -0.649520 |
| 12                   | H    | 1          | 0.904641  | 2.181432  | 0.092618  |
| 13                   | H    | 1          | -0.451900 | -2.056520 | -0.520690 |
| 14                   | H    | 1          | 0.335987  | -0.101800 | 1.714496  |
| 15                   | C    | 6          | 2.517550  | -0.873630 | -0.354830 |

|    |   |   |          |           |           |
|----|---|---|----------|-----------|-----------|
| 16 | H | 1 | 3.242086 | -0.498100 | -1.078550 |
| 17 | H | 1 | 3.016412 | -0.944720 | 0.613310  |
| 18 | H | 1 | 2.224322 | -1.878720 | -0.655680 |

**Table S1.33.** Optimised parameters of Formic acid (P1).

| Cartesian coordinate |      |            |           |           |           |
|----------------------|------|------------|-----------|-----------|-----------|
| Center No.           | Atom | Atomic No. | X         | Y         | Z         |
| 1                    | C    | 6          | 0.133818  | 0.361049  | 0.000043  |
| 2                    | H    | 1          | 0.042063  | 1.459768  | -0.000079 |
| 3                    | O    | 8          | 1.172698  | -0.219860 | -0.000014 |
| 4                    | O    | 8          | -1.056020 | -0.278450 | -0.000004 |
| 5                    | H    | 1          | -1.778430 | 0.360447  | -0.000036 |

**Table S1.34.** Optimised parameters of Formaldehyde (P2).

| Cartesian coordinate |      |            |   |           |           |
|----------------------|------|------------|---|-----------|-----------|
| Center No.           | Atom | Atomic No. | X | Y         | Z         |
| 1                    | O    | 8          | 0 | 0         | 0.672848  |
| 2                    | C    | 6          | 0 | 0         | -0.526580 |
| 3                    | H    | 1          | 0 | 0.938333  | -1.111650 |
| 4                    | H    | 1          | 0 | -0.938330 | -1.111650 |

**Table S1.35.** Optimised parameters of Butyric acid (P3).

| Cartesian coordinate |      |            |           |           |           |
|----------------------|------|------------|-----------|-----------|-----------|
| Center No.           | Atom | Atomic No. | X         | Y         | Z         |
| 1                    | C    | 6          | -2.701560 | 0.012117  | 0.011388  |
| 2                    | H    | 1          | -2.884510 | 0.753550  | 0.791053  |
| 3                    | H    | 1          | -2.923690 | -0.971040 | 0.429602  |
| 4                    | H    | 1          | -3.411050 | 0.197198  | -0.795360 |
| 5                    | C    | 6          | -1.263410 | 0.085939  | -0.496840 |
| 6                    | H    | 1          | -1.114200 | -0.645510 | -1.293630 |
| 7                    | H    | 1          | -1.073110 | 1.068627  | -0.931720 |
| 8                    | C    | 6          | -0.238980 | -0.178430 | 0.621838  |
| 9                    | H    | 1          | -0.399450 | -1.167090 | 1.048624  |
| 10                   | H    | 1          | -0.356800 | 0.566688  | 1.409621  |
| 11                   | C    | 6          | 1.174187  | -0.134040 | 0.103941  |
| 12                   | O    | 8          | 1.835511  | -1.086180 | -0.221330 |
| 13                   | O    | 8          | 1.640467  | 1.136280  | 0.004468  |
| 14                   | H    | 1          | 2.533559  | 1.083236  | -0.365260 |

**Table S1.36.** Optimised parameters of n-Butyraldehyde oxide (P4).

| Cartesian coordinate |      |            |          |          |           |
|----------------------|------|------------|----------|----------|-----------|
| Center No.           | Atom | Atomic No. | X        | Y        | Z         |
| 1                    | C    | 6          | 1.567124 | 0.545660 | -0.052030 |
| 2                    | H    | 1          | 1.553666 | 1.296743 | 0.741170  |
| 3                    | H    | 1          | 1.291162 | 1.062457 | -0.972870 |



|    |   |   |           |           |           |
|----|---|---|-----------|-----------|-----------|
| 4  | C | 6 | 0.509598  | -0.536060 | 0.250549  |
| 5  | H | 1 | 0.797716  | -1.062030 | 1.167840  |
| 6  | H | 1 | 0.469732  | -1.272710 | -0.552030 |
| 7  | C | 6 | -0.841430 | 0.033947  | 0.451402  |
| 8  | H | 1 | -1.086780 | 0.742481  | 1.238881  |
| 9  | O | 8 | -1.770570 | -0.284250 | -0.329360 |
| 10 | O | 8 | -3.010810 | 0.261556  | -0.142180 |
| 11 | C | 6 | 2.969855  | -0.043880 | -0.183050 |
| 12 | H | 1 | 3.699437  | 0.735057  | -0.402700 |
| 13 | H | 1 | 3.278989  | -0.539490 | 0.738605  |
| 14 | H | 1 | 3.016218  | -0.778950 | -0.987800 |

**Table S1.37.** Optimised parameters of 1-Pentene (P5).

| Cartesian coordinate |   |            |           |           |           |
|----------------------|---|------------|-----------|-----------|-----------|
| Center No.           |   | Atomic No. | X         | Y         | Z         |
| 1                    | C | 6          | -2.426330 | -0.194980 | -0.076810 |
| 2                    | H | 1          | -2.688810 | -0.242160 | 0.981859  |
| 3                    | H | 1          | -3.209220 | 0.366864  | -0.587340 |
| 4                    | H | 1          | -2.444250 | -1.214910 | -0.465580 |
| 5                    | C | 6          | -1.056160 | 0.449697  | -0.278870 |
| 6                    | H | 1          | -1.076420 | 1.478412  | 0.091623  |
| 7                    | H | 1          | -0.830680 | 0.515568  | -1.345970 |
| 8                    | C | 6          | 0.075345  | -0.316770 | 0.423379  |

|    |   |   |           |           |           |
|----|---|---|-----------|-----------|-----------|
| 9  | H | 1 | -0.168070 | -0.392190 | 1.489341  |
| 10 | H | 1 | 0.119461  | -1.339920 | 0.041378  |
| 11 | C | 6 | 1.415376  | 0.337267  | 0.270244  |
| 12 | H | 1 | 1.494200  | 1.349787  | 0.658226  |
| 13 | C | 6 | 2.480470  | -0.212330 | -0.300600 |
| 14 | H | 1 | 2.452604  | -1.217880 | -0.703760 |
| 15 | H | 1 | 3.418959  | 0.319082  | -0.383870 |

**Table S1.38.** Optimised parameters of Isobutyric acid (P6).

| Cartesian coordinate |      |            |           |           |           |
|----------------------|------|------------|-----------|-----------|-----------|
| Center No.           | Atom | Atomic No. | X         | Y         | Z         |
| 1                    | O    | 8          | -1.110880 | -1.130300 | 0.676780  |
| 2                    | C    | 6          | -0.782050 | -0.191820 | -0.001610 |
| 3                    | C    | 6          | 0.635017  | 0.177794  | -0.391190 |
| 4                    | C    | 6          | 1.560690  | -1.034230 | -0.314290 |
| 5                    | H    | 1          | 2.569508  | -0.752720 | -0.616540 |
| 6                    | H    | 1          | 1.601704  | -1.427310 | 0.700578  |
| 7                    | H    | 1          | 1.221058  | -1.838400 | -0.966040 |
| 8                    | C    | 6          | 1.119688  | 1.331581  | 0.506948  |
| 9                    | H    | 1          | 1.155329  | 1.018167  | 1.551053  |
| 10                   | H    | 1          | 2.124762  | 1.632135  | 0.211653  |
| 11                   | H    | 1          | 0.467636  | 2.200092  | 0.429338  |
| 12                   | H    | 1          | 0.592023  | 0.547253  | -1.418000 |

|    |   |   |           |          |           |
|----|---|---|-----------|----------|-----------|
| 13 | O | 8 | -1.685990 | 0.693516 | -0.491410 |
| 14 | H | 1 | -2.55713  | 0.415118 | -0.174170 |

**Table S1.39.** Optimised parameters of Isobutyraldehyde oxide (P7).

| Cartesian coordinate |      |            |           |           |           |
|----------------------|------|------------|-----------|-----------|-----------|
| Center No.           | Atom | Atomic No. | X         | Y         | Z         |
| 1                    | C    | 6          | 0.450491  | -0.474100 | -0.345380 |
| 2                    | O    | 8          | 1.339479  | 0.279480  | 0.113287  |
| 3                    | C    | 6          | -0.965460 | -0.022110 | -0.417050 |
| 4                    | H    | 1          | -1.232440 | -0.072630 | -1.481490 |
| 5                    | C    | 6          | -1.175200 | 1.408474  | 0.078245  |
| 6                    | H    | 1          | -0.558350 | 2.118375  | -0.470060 |
| 7                    | H    | 1          | -2.219240 | 1.692108  | -0.048060 |
| 8                    | H    | 1          | -0.924350 | 1.497707  | 1.135006  |
| 9                    | C    | 6          | -1.864290 | -1.038270 | 0.317667  |
| 10                   | H    | 1          | -2.911820 | -0.781520 | 0.164396  |
| 11                   | H    | 1          | -1.709870 | -2.053750 | -0.047590 |
| 12                   | H    | 1          | -1.663840 | -1.027550 | 1.389137  |
| 13                   | H    | 1          | 0.769327  | -1.460700 | -0.674350 |
| 14                   | O    | 8          | 2.632688  | -0.173980 | 0.165724  |

**Table S1.40.** Optimised parameters of Isopentene (P8).

| Cartesian coordinate |      |            |           |           |           |
|----------------------|------|------------|-----------|-----------|-----------|
| Center No.           | Atom | Atomic No. | X         | Y         | Z         |
| 1                    | C    | 6          | 0.949812  | 0.000158  | 0.413180  |
| 2                    | C    | 6          | 2.146063  | 0.000019  | -0.161590 |
| 3                    | C    | 6          | -0.369710 | -0.000051 | -0.307990 |
| 4                    | H    | 1          | -0.165560 | -0.000018 | -1.382650 |
| 5                    | H    | 1          | 3.057453  | -0.000110 | 0.421108  |
| 6                    | C    | 6          | -1.175000 | -1.264660 | 0.028318  |
| 7                    | H    | 1          | -1.388660 | -1.317170 | 1.098271  |
| 8                    | H    | 1          | -2.129410 | -1.269320 | -0.500710 |
| 9                    | H    | 1          | -0.628360 | -2.166500 | -0.247190 |
| 10                   | H    | 1          | 2.257532  | -0.000150 | -1.239620 |
| 11                   | H    | 1          | 0.887496  | 0.000120  | 1.499512  |
| 12                   | C    | 6          | -1.175130 | 1.264621  | 0.028275  |
| 13                   | H    | 1          | -2.129430 | 1.269264  | -0.50092  |
| 14                   | H    | 1          | -1.388910 | 1.316919  | 1.098204  |
| 15                   | H    | 1          | -0.628410 | 2.166427  | -0.24714  |

**Table S1.41.** Optimised parameters of Ozone.

| Cartesian coordinate |      |            |   |          |           |
|----------------------|------|------------|---|----------|-----------|
| Center No.           | Atom | Atomic No. | X | Y        | Z         |
| 1                    | O    | 8          | 0 | 0        | 0.427990  |
| 2                    | O    | 8          | 0 | 1.076416 | -0.214000 |

|   |   |   |   |           |           |
|---|---|---|---|-----------|-----------|
| 3 | O | 8 | 0 | -1.076420 | -0.214000 |
|---|---|---|---|-----------|-----------|

**Table S2.** Vibrational frequencies ( $\text{cm}^{-1}$ ) for the reactants, transition states, intermediates at B3LYP/6-311+G(2df,2p) level of theory:

**Table S2.1.** Normal mode frequencies of  $\text{CH}_2\text{OO}$ , nBD, IM1n, SOZ-n, IM2n, IM3n, IM4n and POZ-n.

| $\text{CH}_2\text{OO}$ | nBD     | IM1n          | SOZ-n         | IM2n          | IM3n          | IM4n   | POZ-n  |
|------------------------|---------|---------------|---------------|---------------|---------------|--------|--------|
| 530.15                 | 81.53   | 32.68         | 69.26         | 71.79         | 17.39         | 69.38  | 65.29  |
| 674.69                 | 172.88  | 47.77         | 84.09         | 79.76         | 62.28         | 84.26  | 92.71  |
| 925.57                 | 192.43  | 66.01         | 102.05        | 94.34         | 84.67         | 102.09 | 114.84 |
| 949.84                 | 245.31  | 96.23         | 203.64        | 194.17        | 86.19         | 203.73 | 169.39 |
| 1244.87                | 344.68  | 122.63        | <b>244.94</b> | 226.27        | 194.58        | 244.96 | 246.15 |
| 1403.5                 | 669.28  | 158.64        | 309.49        | <b>244.95</b> | 242.97        | 309.51 | 307.77 |
| 1543.3                 | 693.02  | 193.41        | 317.52        | 286.25        | 287.28        | 317.55 | 359.32 |
| 3121.96                | 793.18  | 215.14        | 341.32        | 311.52        | 314.29        | 341.36 | 400.89 |
| 3272.47                | 852.81  | <b>244.36</b> | 657.52        | 372.47        | <b>373.61</b> | 657.53 | 512.70 |
|                        | 952.93  | 254.19        | 700.12        | 501.11        | 413.50        | 700.12 | 695.03 |
|                        | 962.85  | 346.91        | 737.95        | 560.98        | 560.83        | 737.93 | 713.71 |
|                        | 1044.39 | 527.04        | 746.95        | 665.71        | 645.80        | 746.97 | 739.26 |
|                        | 1133.81 | 674.74        | 834.65        | 744.87        | 754.91        | 834.65 | 765.85 |
|                        | 1157.19 | 678.63        | 847.45        | 776.64        | 759.69        | 847.47 | 844.77 |

|  |         |         |         |         |         |         |         |
|--|---------|---------|---------|---------|---------|---------|---------|
|  | 1257.20 | 698.36  | 885.73  | 839.58  | 845.12  | 885.83  | 891.68  |
|  | 1318.86 | 799.80  | 936.32  | 864.86  | 899.99  | 936.31  | 906.55  |
|  | 1326.10 | 855.16  | 948.46  | 915.33  | 911.28  | 948.41  | 922.66  |
|  | 1397.20 | 897.69  | 997.22  | 975.21  | 976.09  | 997.16  | 969.61  |
|  | 1417.87 | 954.18  | 1036.23 | 1039.88 | 1038.95 | 1036.20 | 1005.44 |
|  | 1423.09 | 967.14  | 1068.42 | 1049.23 | 1053.50 | 1068.27 | 1034.66 |
|  | 1452.29 | 992.93  | 1129.55 | 1103.85 | 1085.80 | 1129.52 | 1043.96 |
|  | 1496.56 | 1045.05 | 1133.42 | 1123.95 | 1112.10 | 1133.42 | 1075.56 |
|  | 1506.11 | 1134.88 | 1147.00 | 1163.09 | 1113.27 | 1146.95 | 1131.97 |
|  | 1513.25 | 1150.60 | 1162.15 | 1219.38 | 1214.47 | 1162.10 | 1171.24 |
|  | 1802.75 | 1243.81 | 1218.85 | 1252.19 | 1274.51 | 1218.79 | 1236.31 |
|  | 2864.76 | 1259.55 | 1270.42 | 1280.54 | 1291.75 | 1270.42 | 1269.79 |
|  | 2992.61 | 1318.91 | 1325.79 | 1335.47 | 1315.63 | 1325.80 | 1278.05 |
|  | 3009.32 | 1326.13 | 1330.73 | 1344.34 | 1333.31 | 1330.72 | 1326.98 |
|  | 3024.57 | 1396.99 | 1354.26 | 1391.92 | 1380.53 | 1354.17 | 1338.05 |
|  | 3043.84 | 1417.09 | 1393.55 | 1399.12 | 1396.09 | 1393.53 | 1348.94 |
|  | 3063.07 | 1419.47 | 1405.78 | 1411.81 | 1420.26 | 1405.74 | 1385.20 |
|  | 3088.27 | 1423.90 | 1415.77 | 1422.04 | 1439.91 | 1415.74 | 1404.61 |
|  | 3092.74 | 1452.70 | 1425.08 | 1457.47 | 1486.85 | 1425.06 | 1421.60 |
|  |         | 1496.39 | 1478.32 | 1480.48 | 1500.63 | 1478.32 | 1478.77 |
|  |         | 1505.58 | 1501.72 | 1501.38 | 1504.00 | 1501.71 | 1499.30 |
|  |         | 1512.40 | 1505.63 | 1505.55 | 1510.93 | 1505.63 | 1505.48 |
|  |         | 1567.10 | 1517.77 | 1517.49 | 1515.12 | 1517.76 | 1508.01 |
|  |         | 1754.78 | 1529.05 | 1762.43 | 1803.07 | 1529.07 | 1514.47 |

|  |  |         |         |         |         |         |         |
|--|--|---------|---------|---------|---------|---------|---------|
|  |  | 2929.57 | 3004.36 | 3023.71 | 3027.84 | 3004.70 | 3003.99 |
|  |  | 2988.46 | 3011.92 | 3029.93 | 3032.63 | 3011.87 | 3014.06 |
|  |  | 3024.58 | 3024.57 | 3039.48 | 3055.33 | 3024.57 | 3025.98 |
|  |  | 3038.44 | 3031.53 | 3044.08 | 3059.26 | 3031.55 | 3036.92 |
|  |  | 3044.43 | 3045.23 | 3049.46 | 3060.50 | 3045.22 | 3041.50 |
|  |  | 3063.45 | 3054.97 | 3059.81 | 3088.52 | 3054.97 | 3056.64 |
|  |  | 3087.46 | 3069.82 | 3071.61 | 3094.04 | 3069.81 | 3066.02 |
|  |  | 3090.37 | 3091.96 | 3091.50 | 3108.96 | 3091.94 | 3086.22 |
|  |  | 3136.41 | 3092.72 | 3094.92 | 3154.83 | 3092.70 | 3092.75 |
|  |  | 3281.49 | 3092.95 | 3774.29 | 3824.02 | 3092.95 | 3117.52 |

**Table S2.2.** Normal mode frequencies of TS1n, TS2n, TS3n, TS4n, TS5n, TS6n, TS7n, TS8n, TS9n and TS10n.

| TS1n          | TS2n          | TS3n          | TS4n          | TS5n          | TS6n          | TS7n          | TS8n          | TS9n          | TS10n   |
|---------------|---------------|---------------|---------------|---------------|---------------|---------------|---------------|---------------|---------|
| 253.83i       | 959.32i       | 972.82i       | 808.44i       | 999.95i       | 130.97i       | 767.66i       | 1182.47i      | 420.90i       | 172.07i |
| 35.72         | 70.31         | 63.20         | 72.69         | 26.43         | 55.36         | 70.23         | 60.67         | 62.62         | 51.84   |
| 73.74         | 101.32        | 73.65         | 83.59         | 74.15         | 78.58         | 76.79         | 76.86         | 91.32         | 63.01   |
| 78.41         | 118.36        | 99.39         | 137.50        | 82.25         | 88.09         | 105.69        | 122.72        | 111.45        | 89.30   |
| 185.31        | 180.68        | 207.63        | 220.31        | 176.41        | 147.75        | 169.15        | 178.77        | 146.26        | 149.92  |
| 191.80        | 232.59        | 224.47        | <b>240.45</b> | 216.78        | 176.99        | 219.63        | <b>243.60</b> | <b>244.96</b> | 188.18  |
| <b>246.87</b> | <b>244.57</b> | <b>251.56</b> | 288.34        | <b>243.70</b> | <b>243.76</b> | <b>245.81</b> | 271.68        | 289.67        | 213.73  |
| 280.03        | 300.72        | 264.05        | 308.79        | 304.75        | 322.24        | 277.38        | 291.58        | 309.47        | 239.86  |
| 354.73        | 415.12        | 322.58        | 343.83        | 345.71        | 342.34        | 314.84        | 330.95        | 364.53        | 357.83  |

|         |         |         |         |         |         |         |         |         |         |
|---------|---------|---------|---------|---------|---------|---------|---------|---------|---------|
| 406.48  | 472.67  | 391.47  | 364.01  | 487.07  | 355.88  | 374.87  | 386.85  | 467.94  | 397.16  |
| 449.44  | 510.28  | 454.39  | 545.36  | 546.31  | 399.68  | 461.19  | 446.52  | 509.56  | 451.21  |
| 548.24  | 630.38  | 648.07  | 629.67  | 577.95  | 487.65  | 524.60  | 573.18  | 565.52  | 477.07  |
| 679.33  | 711.33  | 700.93  | 725.14  | 747.27  | 670.53  | 669.79  | 622.81  | 602.14  | 653.41  |
| 733.96  | 758.01  | 751.34  | 750.78  | 760.96  | 686.83  | 712.13  | 742.15  | 756.79  | 742.75  |
| 759.25  | 810.79  | 834.54  | 786.85  | 804.04  | 725.33  | 744.83  | 775.30  | 865.23  | 753.07  |
| 827.33  | 862.74  | 857.31  | 820.47  | 894.56  | 838.77  | 848.03  | 885.68  | 889.29  | 873.40  |
| 862.40  | 896.29  | 874.87  | 880.32  | 908.18  | 866.11  | 864.14  | 894.43  | 904.78  | 880.06  |
| 911.31  | 925.13  | 981.98  | 912.50  | 948.01  | 947.97  | 881.29  | 910.63  | 948.65  | 953.00  |
| 965.08  | 946.75  | 1044.25 | 942.08  | 976.80  | 961.92  | 973.84  | 935.19  | 1002.08 | 957.02  |
| 980.07  | 1007.65 | 1049.65 | 1000.17 | 1039.32 | 1005.87 | 1012.40 | 991.39  | 1041.52 | 992.66  |
| 1039.14 | 1032.03 | 1069.62 | 1033.93 | 1111.35 | 1047.13 | 1044.77 | 1045.17 | 1069.20 | 1044.26 |
| 1048.83 | 1067.45 | 1133.52 | 1058.54 | 1115.95 | 1119.32 | 1112.99 | 1111.48 | 1094.46 | 1075.12 |
| 1132.63 | 1110.25 | 1170.38 | 1109.53 | 1222.97 | 1141.84 | 1126.18 | 1126.19 | 1130.97 | 1099.77 |
| 1137.00 | 1134.79 | 1259.97 | 1125.60 | 1252.97 | 1156.45 | 1135.12 | 1171.78 | 1171.81 | 1113.65 |
| 1228.61 | 1177.29 | 1311.73 | 1138.71 | 1287.99 | 1244.08 | 1211.81 | 1208.37 | 1235.56 | 1122.52 |
| 1260.05 | 1187.14 | 1329.48 | 1231.11 | 1308.01 | 1257.01 | 1258.64 | 1245.27 | 1262.14 | 1182.70 |
| 1315.30 | 1244.24 | 1339.68 | 1255.06 | 1314.26 | 1327.88 | 1310.85 | 1261.11 | 1268.47 | 1260.70 |
| 1327.54 | 1254.66 | 1373.40 | 1275.13 | 1329.39 | 1330.36 | 1322.71 | 1309.74 | 1306.07 | 1298.18 |
| 1393.72 | 1273.67 | 1378.15 | 1309.10 | 1381.46 | 1359.77 | 1329.34 | 1330.54 | 1329.38 | 1301.70 |
| 1396.07 | 1291.07 | 1401.53 | 1316.84 | 1418.65 | 1412.81 | 1364.13 | 1339.85 | 1359.04 | 1327.82 |
| 1402.54 | 1323.39 | 1416.69 | 1344.69 | 1421.20 | 1424.37 | 1389.76 | 1384.18 | 1381.93 | 1389.63 |
| 1420.36 | 1377.48 | 1422.56 | 1366.45 | 1445.06 | 1442.88 | 1398.27 | 1412.66 | 1418.81 | 1420.61 |
| 1462.91 | 1383.53 | 1453.37 | 1387.31 | 1490.44 | 1485.53 | 1421.42 | 1422.88 | 1459.76 | 1456.67 |



|         |         |         |         |         |         |         |         |         |         |
|---------|---------|---------|---------|---------|---------|---------|---------|---------|---------|
| 1500.70 | 1418.27 | 1499.77 | 1418.37 | 1500.98 | 1498.84 | 1460.38 | 1480.42 | 1477.25 | 1466.47 |
| 1505.32 | 1480.98 | 1506.19 | 1476.28 | 1504.22 | 1506.82 | 1499.57 | 1500.04 | 1484.30 | 1499.79 |
| 1515.01 | 1500.29 | 1514.74 | 1499.52 | 1515.00 | 1513.45 | 1505.71 | 1503.45 | 1498.25 | 1505.33 |
| 1547.70 | 1502.63 | 1569.23 | 1501.12 | 1606.58 | 1553.14 | 1512.73 | 1505.35 | 1503.99 | 1514.03 |
| 1599.58 | 1515.65 | 1635.75 | 1513.60 | 1648.58 | 1646.26 | 1526.98 | 1516.39 | 1512.75 | 1586.38 |
| 2980.77 | 2094.63 | 1835.57 | 2122.47 | 1776.34 | 2966.84 | 2413.37 | 2185.51 | 2896.76 | 2985.08 |
| 2997.05 | 2840.93 | 2991.68 | 2850.07 | 2994.68 | 2995.16 | 2901.78 | 2981.02 | 3008.56 | 3009.94 |
| 3024.42 | 2963.83 | 3010.89 | 2877.97 | 3028.81 | 3028.64 | 3000.03 | 3018.92 | 3020.59 | 3022.71 |
| 3036.35 | 3025.88 | 3025.64 | 3026.72 | 3034.60 | 3032.70 | 3025.97 | 3027.91 | 3026.56 | 3026.50 |
| 3053.02 | 3029.32 | 3048.06 | 3040.63 | 3052.76 | 3035.82 | 3047.16 | 3032.55 | 3054.06 | 3060.45 |
| 3066.56 | 3050.69 | 3059.92 | 3058.05 | 3064.39 | 3048.15 | 3057.68 | 3044.36 | 3071.33 | 3085.97 |
| 3087.82 | 3068.90 | 3067.62 | 3065.75 | 3084.27 | 3070.44 | 3065.89 | 3062.32 | 3089.08 | 3093.19 |
| 3090.07 | 3090.18 | 3075.05 | 3089.09 | 3090.16 | 3094.66 | 3079.04 | 3081.35 | 3092.49 | 3156.44 |
| 3146.16 | 3094.81 | 3094.09 | 3091.99 | 3096.33 | 3100.40 | 3093.38 | 3094.21 | 3107.92 | 3166.24 |
| 3287.25 | 3107.20 | 3096.85 | 3109.74 | 3109.39 | 3200.35 | 3096.58 | 3096.40 | 3227.92 | 3251.20 |

**Table S2.3.** Normal mode frequencies of iBD, IM1i, SOZ-I, IM2i, IM3i, IM4i and POZ-i

| iBD    | IM1i   | SOZ-i         | IM2i   | IM3i   | IM4i   | POZ-i  |
|--------|--------|---------------|--------|--------|--------|--------|
| 95.52  | 29.33  | 75.30         | 80.28  | 26.73  | 39.69  | 76.34  |
| 201.05 | 44.99  | 99.13         | 89.99  | 66.23  | 84.46  | 99.93  |
| 228.12 | 73.99  | 196.58        | 177.42 | 83.71  | 92.62  | 196.93 |
| 270.88 | 90.37  | 208.23        | 214.34 | 195.09 | 129.94 | 219.57 |
| 342.93 | 143.73 | <b>240.85</b> | 234.99 | 215.12 | 191.87 | 238.65 |
| 400.82 | 184.29 | 258.69        | 244.65 | 243.00 | 210.14 | 313.24 |

|         |               |         |               |               |         |         |
|---------|---------------|---------|---------------|---------------|---------|---------|
| 639.25  | 205.36        | 330.81  | 263.25        | 252.17        | 220.35  | 349.72  |
| 792.18  | 213.97        | 360.74  | 296.15        | 309.12        | 264.66  | 381.64  |
| 914.63  | <b>232.70</b> | 446.41  | 358.94        | 343.70        | 298.99  | 445.50  |
| 926.80  | 276.81        | 593.50  | 460.83        | <b>378.17</b> | 320.68  | 492.13  |
| 946.21  | 352.29        | 707.92  | 515.82        | 509.46        | 359.90  | 689.23  |
| 974.70  | 417.51        | 746.51  | <b>559.22</b> | 535.35        | 453.37  | 718.75  |
| 1129.43 | 526.83        | 823.94  | 618.64        | 644.87        | 464.00  | 766.38  |
| 1154.64 | 648.01        | 883.30  | 771.23        | 775.34        | 539.12  | 820.08  |
| 1201.82 | 678.75        | 915.82  | 840.84        | 807.66        | 602.63  | 895.36  |
| 1305.29 | 796.65        | 934.15  | 863.60        | 900.36        | 832.29  | 920.86  |
| 1355.26 | 897.26        | 947.87  | 939.08        | 944.04        | 926.58  | 938.09  |
| 1407.79 | 913.71        | 972.44  | 960.99        | 962.12        | 934.47  | 961.92  |
| 1412.44 | 931.60        | 992.36  | 973.83        | 973.72        | 945.70  | 984.47  |
| 1434.81 | 948.55        | 1063.77 | 1048.65       | 1045.60       | 976.44  | 994.69  |
| 1490.31 | 974.37        | 1091.44 | 1109.34       | 1063.81       | 980.03  | 1026.32 |
| 1494.29 | 992.49        | 1137.97 | 1131.85       | 1111.38       | 1110.09 | 1033.09 |
| 1508.36 | 1123.21       | 1148.70 | 1136.37       | 1116.74       | 1145.93 | 1134.56 |
| 1512.73 | 1148.74       | 1161.19 | 1206.52       | 1190.94       | 1154.73 | 1184.64 |
| 1801.51 | 1199.84       | 1210.65 | 1218.95       | 1255.16       | 1208.23 | 1195.50 |
| 2856.51 | 1243.88       | 1220.20 | 1269.82       | 1289.68       | 1254.27 | 1247.13 |
| 2975.58 | 1305.12       | 1327.90 | 1349.98       | 1351.60       | 1294.27 | 1294.27 |
| 3030.96 | 1366.72       | 1346.18 | 1368.46       | 1353.35       | 1349.59 | 1318.67 |
| 3042.00 | 1404.83       | 1371.14 | 1394.23       | 1396.04       | 1377.87 | 1349.26 |
| 3091.28 | 1413.47       | 1397.37 | 1400.20       | 1403.78       | 1414.12 | 1357.93 |

|         |         |         |         |         |         |         |
|---------|---------|---------|---------|---------|---------|---------|
| 3100.18 | 1417.51 | 1407.61 | 1407.57 | 1424.18 | 1433.55 | 1396.15 |
| 3103.59 | 1434.31 | 1410.66 | 1423.30 | 1441.32 | 1492.28 | 1408.65 |
| 3112.83 | 1491.49 | 1433.61 | 1458.29 | 1494.40 | 1494.80 | 1430.34 |
|         | 1493.90 | 1494.57 | 1495.46 | 1496.46 | 1506.74 | 1493.79 |
|         | 1508.02 | 1499.26 | 1499.18 | 1507.17 | 1513.61 | 1497.90 |
|         | 1513.22 | 1508.42 | 1509.36 | 1510.88 | 1515.36 | 1505.00 |
|         | 1567.05 | 1520.85 | 1522.20 | 1517.97 | 1566.27 | 1510.84 |
|         | 1754.30 | 1529.43 | 1762.89 | 1799.41 | 1708.23 | 1518.08 |
|         | 2922.94 | 3000.58 | 3025.51 | 3035.53 | 2955.10 | 3013.54 |
|         | 3023.70 | 3012.01 | 3031.93 | 3038.22 | 2961.18 | 3023.87 |
|         | 3029.53 | 3019.73 | 3039.18 | 3061.28 | 3018.79 | 3028.34 |
|         | 3040.21 | 3034.00 | 3040.67 | 3065.30 | 3046.07 | 3039.94 |
|         | 3090.32 | 3042.32 | 3042.95 | 3096.41 | 3048.58 | 3047.67 |
|         | 3097.78 | 3093.72 | 3091.27 | 3098.90 | 3110.14 | 3081.42 |
|         | 3101.58 | 3094.74 | 3098.05 | 3106.43 | 3112.48 | 3086.41 |
|         | 3108.20 | 3098.80 | 3104.35 | 3113.41 | 3117.37 | 3096.44 |
|         | 3136.46 | 3104.28 | 3119.13 | 3155.67 | 3128.65 | 3114.36 |
|         | 3281.50 | 3115.51 | 3775.97 | 3824.50 | 3179.23 | 3121.53 |

Note: 'i' stands for imaginary frequency

**Table S2.4.** Normal mode frequencies of TS1i, TS2i, TS3i, TS4i, TS5i, TS6i, TS7i, TS8i, TS9i and TS10i.

| TS1i    | TS2i    | TS3i    | TS4i    | TS5i    | TS6i    | TS7i    | TS8i     | TS9i    | TS10i   |
|---------|---------|---------|---------|---------|---------|---------|----------|---------|---------|
| 239.33i | 936.73i | 962.51i | 824.45i | 989.93i | 138.91i | 755.32i | 1192.22i | 428.76i | 181.07i |
| 40.96   | 86.29   | 66.08   | 68.61   | 20.39   | 47.46   | 71.05   | 52.33    | 69.71   | 44.48   |

|               |               |               |               |               |               |               |               |         |         |
|---------------|---------------|---------------|---------------|---------------|---------------|---------------|---------------|---------|---------|
| 63.18         | 99.68         | 99.38         | 172.82        | 85.57         | 83.99         | 111.84        | 112.00        | 84.71   | 75.37   |
| 140.28        | 180.08        | 155.49        | 186.01        | 168.10        | 128.25        | 142.01        | 193.11        | 183.74  | 134.00  |
| 212.18        | 205.89        | 205.13        | 214.68        | 211.08        | 191.61        | 198.98        | 211.47        | 218.55  | 191.84  |
| <b>231.63</b> | 214.67        | <b>219.32</b> | <b>239.18</b> | 216.55        | 214.99        | 212.39        | <b>229.98</b> | 247.69  | 225.56  |
| 243.49        | <b>231.26</b> | 262.52        | 259.02        | <b>251.28</b> | <b>231.43</b> | <b>237.92</b> | 269.66        | 292.52  | 246.65  |
| 284.67        | 314.80        | 268.13        | 298.27        | 265.07        | 287.33        | 264.50        | 315.87        | 314.98  | 263.96  |
| 299.19        | 359.94        | 334.54        | 327.76        | 297.42        | 333.08        | 333.88        | 325.49        | 356.90  | 339.30  |
| 382.19        | 460.55        | 367.80        | 372.54        | 413.47        | 366.06        | 363.17        | 368.59        | 410.73  | 370.69  |
| 404.62        | 476.93        | 414.72        | 466.70        | 530.66        | 420.80        | 432.13        | 401.90        | 474.98  | 419.84  |
| 514.94        | 508.45        | 481.43        | 537.39        | 545.45        | 466.83        | 481.28        | 493.42        | 521.08  | 491.06  |
| 562.81        | 632.37        | 642.49        | 637.08        | 585.02        | 508.09        | 531.52        | 548.18        | 574.16  | 497.56  |
| 652.89        | 728.23        | 697.39        | 649.67        | 761.84        | 604.14        | 622.71        | 619.72        | 600.77  | 722.26  |
| 756.74        | 776.25        | 812.70        | 781.12        | 799.48        | 698.76        | 710.51        | 787.18        | 823.50  | 745.64  |
| 805.27        | 824.47        | 849.34        | 833.41        | 860.98        | 836.93        | 813.24        | 826.50        | 889.64  | 802.97  |
| 908.83        | 879.31        | 935.97        | 886.85        | 929.14        | 927.29        | 873.89        | 893.80        | 907.12  | 922.88  |
| 919.97        | 932.54        | 963.31        | 939.73        | 944.93        | 944.21        | 935.35        | 914.04        | 936.36  | 939.15  |
| 942.16        | 940.66        | 977.62        | 942.40        | 969.16        | 949.08        | 951.43        | 940.73        | 969.63  | 957.09  |
| 968.69        | 958.28        | 1027.26       | 957.94        | 974.71        | 978.55        | 973.26        | 972.35        | 978.55  | 968.21  |
| 983.01        | 1000.20       | 1069.37       | 981.19        | 1113.36       | 983.53        | 994.63        | 997.52        | 1068.33 | 997.67  |
| 1043.45       | 1055.36       | 1151.06       | 1042.56       | 1115.11       | 1106.23       | 1107.61       | 1116.17       | 1092.36 | 1016.80 |
| 1111.41       | 1089.21       | 1164.59       | 1108.27       | 1193.73       | 1147.68       | 1123.16       | 1134.45       | 1135.57 | 1097.22 |
| 1136.19       | 1140.99       | 1212.66       | 1132.40       | 1222.77       | 1160.03       | 1146.83       | 1168.91       | 1171.84 | 1111.68 |
| 1198.36       | 1157.48       | 1304.94       | 1138.60       | 1286.80       | 1209.59       | 1209.63       | 1192.83       | 1188.70 | 1119.61 |
| 1229.33       | 1188.97       | 1327.96       | 1195.00       | 1311.10       | 1243.01       | 1212.17       | 1208.31       | 1241.70 | 1186.10 |

|         |         |         |         |         |         |         |         |         |         |
|---------|---------|---------|---------|---------|---------|---------|---------|---------|---------|
| 1318.50 | 1207.13 | 1349.21 | 1236.85 | 1340.17 | 1295.99 | 1318.02 | 1263.73 | 1269.71 | 1209.01 |
| 1369.35 | 1262.30 | 1373.80 | 1276.25 | 1347.71 | 1345.64 | 1322.45 | 1315.48 | 1312.24 | 1295.82 |
| 1397.24 | 1280.62 | 1379.53 | 1314.98 | 1403.49 | 1371.50 | 1335.62 | 1334.53 | 1346.06 | 1320.96 |
| 1398.26 | 1311.24 | 1406.14 | 1345.53 | 1411.07 | 1412.80 | 1369.65 | 1338.70 | 1355.53 | 1337.71 |
| 1403.07 | 1365.27 | 1407.88 | 1349.41 | 1420.36 | 1431.22 | 1396.13 | 1393.37 | 1404.16 | 1402.39 |
| 1420.64 | 1386.28 | 1431.10 | 1365.08 | 1458.29 | 1482.54 | 1406.00 | 1413.02 | 1424.00 | 1422.56 |
| 1492.67 | 1403.48 | 1493.72 | 1402.21 | 1493.61 | 1492.59 | 1427.31 | 1431.80 | 1455.39 | 1455.43 |
| 1496.27 | 1421.80 | 1498.76 | 1424.79 | 1496.25 | 1495.88 | 1491.23 | 1494.51 | 1485.18 | 1494.01 |
| 1506.54 | 1483.95 | 1506.96 | 1486.46 | 1506.69 | 1506.69 | 1496.32 | 1497.40 | 1492.89 | 1494.34 |
| 1518.56 | 1495.61 | 1517.77 | 1496.57 | 1521.67 | 1513.98 | 1503.05 | 1501.53 | 1495.44 | 1505.98 |
| 1548.23 | 1499.07 | 1564.62 | 1501.05 | 1607.17 | 1543.46 | 1511.21 | 1506.72 | 1511.16 | 1517.52 |
| 1599.82 | 1515.61 | 1635.66 | 1514.77 | 1649.60 | 1641.40 | 1519.52 | 1517.65 | 1515.04 | 1581.09 |
| 2983.19 | 2096.75 | 1834.78 | 2125.48 | 1772.67 | 2957.65 | 2415.19 | 2167.67 | 2881.98 | 2998.75 |
| 3028.82 | 2846.75 | 2963.35 | 2850.91 | 2994.35 | 2966.53 | 2900.95 | 2978.85 | 3024.87 | 3026.90 |
| 3036.45 | 2957.88 | 3009.81 | 2877.05 | 3038.32 | 3031.89 | 2972.91 | 3012.73 | 3026.08 | 3031.36 |
| 3039.11 | 3032.96 | 3039.34 | 3035.25 | 3040.94 | 3046.17 | 3038.83 | 3028.01 | 3032.46 | 3085.21 |
| 3091.32 | 3038.66 | 3046.35 | 3039.18 | 3064.58 | 3048.87 | 3045.41 | 3035.81 | 3081.50 | 3091.95 |
| 3095.25 | 3054.50 | 3060.04 | 3062.99 | 3083.81 | 3108.05 | 3052.81 | 3040.58 | 3086.62 | 3102.64 |
| 3099.64 | 3089.20 | 3098.01 | 3094.40 | 3100.19 | 3113.05 | 3095.39 | 3088.99 | 3094.17 | 3118.09 |
| 3108.15 | 3093.08 | 3107.09 | 3100.22 | 3103.41 | 3118.97 | 3105.63 | 3094.87 | 3109.24 | 3156.81 |
| 3145.92 | 3112.82 | 3119.84 | 3111.18 | 3110.50 | 3132.11 | 3121.16 | 3122.60 | 3116.27 | 3160.91 |
| 3287.33 | 3118.97 | 3124.65 | 3118.86 | 3118.18 | 3194.20 | 3122.88 | 3122.83 | 3233.13 | 3251.31 |

**Table S2.5.** Normal mode frequencies of formic acid (P1), formaldehyde (P2), butyric acid (P3), n-butyraldehyde oxide (P4), 1-pentene (P5), isobutyric acid (P6), isobutyraldehyde oxide (P7), isopentane (P8) and ozone.

| Formic acid (P1) | Formaldehyde (P2) | Butyric acid (P3) | N-butyraldehyde oxide (P4) | 1-Pentene (P5) | Iso butyric acid (P6) | Iso butyraldehyde oxide (P7) | Iso pentene (P8) | Ozone   |
|------------------|-------------------|-------------------|----------------------------|----------------|-----------------------|------------------------------|------------------|---------|
| 533.21           | 1200.41           | 26.78             | 66.43                      | 96.90          | 36.10                 | 86.34                        | 98.52            | 748.52  |
| 661.12           | 1264.24           | 90.41             | 89.50                      | 102.48         | 117.67                | 189.99                       | 222.98           | 1209.08 |
| 1035.86          | 1530.74           | 185.37            | 169.52                     | 230.23         | 153.12                | 196.01                       | 239.66           | 1259.78 |
| 1105.50          | 1817.03           | 243.32            | 244.39                     | 245.84         | 207.18                | 222.18                       | 312.84           |         |
| 1269.04          | 2887.10           | 329.09            | 301.10                     | 383.79         | 214.76                | 258.55                       | 321.71           |         |
| 1415.83          | 2942.95           | 431.17            | 337.76                     | 436.94         | 330.12                | 334.82                       | 346.77           |         |
| 1859.95          |                   | 581.94            | 384.68                     | 645.22         | 444.36                | 437.10                       | 504.69           |         |
| 2963.13          |                   | 621.28            | 580.64                     | 751.22         | 580.91                | 444.38                       | 697.29           |         |
|                  |                   | 742.05            | 749.03                     | 878.38         | 658.98                | 603.68                       | 801.11           |         |
|                  |                   | 758.33            | 848.83                     | 889.64         | 815.43                | 826.62                       | 930.62           |         |
|                  |                   | 876.66            | 882.22                     | 952.44         | 862.74                | 928.33                       | 933.02           |         |
|                  |                   | 896.64            | 944.87                     | 953.16         | 979.70                | 930.04                       | 952.89           |         |
|                  |                   | 914.43            | 950.50                     | 1026.50        | 1030.29               | 941.85                       | 963.87           |         |
|                  |                   | 1038.46           | 1021.05                    | 1035.81        | 1105.09               | 971.69                       | 1008.29          |         |
|                  |                   | 1073.79           | 1042.62                    | 1051.84        | 1110.20               | 975.38                       | 1035.74          |         |

|  |  |         |         |         |         |         |         |  |
|--|--|---------|---------|---------|---------|---------|---------|--|
|  |  | 1113.04 | 1106.10 | 1114.61 | 1173.08 | 1109.32 | 1115.19 |  |
|  |  | 1199.74 | 1178.44 | 1198.79 | 1199.19 | 1140.51 | 1185.29 |  |
|  |  | 1261.42 | 1259.25 | 1268.37 | 1216.96 | 1205.36 | 1218.60 |  |
|  |  | 1300.73 | 1295.75 | 1303.75 | 1281.05 | 1301.87 | 1322.50 |  |
|  |  | 1327.37 | 1328.56 | 1324.26 | 1382.27 | 1343.20 | 1338.20 |  |
|  |  | 1363.06 | 1358.58 | 1335.44 | 1421.73 | 1374.90 | 1343.06 |  |
|  |  | 1382.57 | 1381.64 | 1381.55 | 1464.89 | 1411.62 | 1400.71 |  |
|  |  | 1420.69 | 1422.48 | 1417.88 | 1472.34 | 1433.11 | 1420.11 |  |
|  |  | 1488.05 | 1474.81 | 1458.82 | 1483.01 | 1492.34 | 1462.08 |  |
|  |  | 1500.82 | 1498.66 | 1486.83 | 1495.43 | 1496.15 | 1492.97 |  |
|  |  | 1504.13 | 1504.58 | 1498.38 | 1500.38 | 1508.06 | 1493.71 |  |
|  |  | 1515.55 | 1513.25 | 1503.86 | 1504.46 | 1513.87 | 1505.65 |  |
|  |  | 1807.82 | 1566.52 | 1513.82 | 1808.96 | 1565.84 | 1514.27 |  |
|  |  | 3028.32 | 3003.84 | 1702.76 | 3036.86 | 2971.87 | 1700.84 |  |
|  |  | 3034.14 | 3030.09 | 2995.02 | 3042.72 | 3037.40 | 3013.31 |  |
|  |  | 3055.60 | 3033.50 | 3017.14 | 3046.41 | 3047.15 | 3021.05 |  |
|  |  | 3061.38 | 3059.48 | 3024.74 | 3062.63 | 3103.02 | 3025.40 |  |
|  |  | 3089.59 | 3087.02 | 3034.44 | 3107.83 | 3107.66 | 3077.99 |  |
|  |  | 3094.98 | 3096.83 | 3053.30 | 3114.02 | 3111.57 | 3084.37 |  |
|  |  | 3111.88 | 3101.78 | 3083.82 | 3116.25 | 3117.46 | 3095.17 |  |
|  |  | 3753.82 | 3136.89 | 3089.06 | 3153.19 | 3131.44 | 3096.57 |  |
|  |  |         |         | 3114.67 |         |         | 3105.70 |  |
|  |  |         |         | 3129.47 |         |         | 3128.69 |  |
|  |  |         |         | 3209.22 |         |         | 3208.21 |  |

**Table S3.** Theoretically calculated relative zero-point energy correction ( $\Delta E_{ZPE}$ ), reaction energy ( $\Delta E_r^0$ ), change in reaction enthalpy ( $\Delta H^0$ ), Gibbs' free energy change ( $\Delta G^0$ ), entropy ( $S^0$ ) and zero-point energy corrected activation barrier heights ( $\Delta E_{r,ZPE}$ ) for all the stationary points at CCSD(T)-F12/cc-pVTZ-F12//B3LYP/6-311+G(2df,2p).

| (CH <sub>2</sub> OO + nBD)     |                                            |                                        |                                        |                                                |                                                       |                                                           |
|--------------------------------|--------------------------------------------|----------------------------------------|----------------------------------------|------------------------------------------------|-------------------------------------------------------|-----------------------------------------------------------|
| Stationary Points              | B3LYP/6-311+G(2df,2p)                      |                                        |                                        |                                                | CCSD(T)-F12/cc-pVTZ-F12                               |                                                           |
|                                | $\Delta E_{ZPE}$<br>kcal mol <sup>-1</sup> | $\Delta H^0$<br>kcal mol <sup>-1</sup> | $\Delta G^0$<br>kcal mol <sup>-1</sup> | $S^0$<br>cal K <sup>-1</sup> mol <sup>-1</sup> | $\Delta E_r^0$ <sup>a</sup><br>kcal mol <sup>-1</sup> | $\Delta E_{r,ZPE}$ <sup>b</sup><br>kcal mol <sup>-1</sup> |
| CH <sub>2</sub> OO + nBD       |                                            | 0                                      | 0                                      | 137.05                                         | 0                                                     | 0                                                         |
| TS1n                           | 2.17                                       | -2.40                                  | 9.94                                   | 95.66                                          | -8.49                                                 | -6.32                                                     |
| TS2n                           | -0.31                                      | -1.02                                  | 12.55                                  | 91.52                                          | -12.12                                                | -12.43                                                    |
| TS3n                           | 1.62                                       | -104.82                                | -91.80                                 | 93.36                                          | -111.34                                               | -109.72                                                   |
| TS4n                           | -0.44                                      | -1.65                                  | 11.97                                  | 91.37                                          | -12.37                                                | -12.81                                                    |
| TS5n                           | 1.88                                       | -103.82                                | -91.29                                 | 95.00                                          | -110.88                                               | -109.00                                                   |
| TS6n                           | 1.99                                       | -6.43                                  | 5.95                                   | 95.51                                          | -10.93                                                | -8.95                                                     |
| TS7n                           | 0.29                                       | -4.52                                  | 8.36                                   | 93.86                                          | -9.19                                                 | -8.90                                                     |
| TS8n                           | 0.27                                       | -4.95                                  | 8.15                                   | 93.10                                          | -10.26                                                | -10.00                                                    |
| TS9n                           | 2.40                                       | 24.18                                  | 37.49                                  | 92.41                                          | 15.53                                                 | 17.94                                                     |
| TS10n                          | 1.28                                       | 61.45                                  | 74.08                                  | 94.69                                          | 55.00                                                 | 56.28                                                     |
| IM1n                           | 1.26                                       | -4.25                                  | 5.29                                   | 105.02                                         | -9.50                                                 | -8.24                                                     |
| SOZ-n                          | 5.41                                       | -40.80                                 | -26.88                                 | 90.36                                          | -56.48                                                | -51.08                                                    |
| IM2n                           | 5.31                                       | -117.63                                | -104.61                                | 93.36                                          | -132.68                                               | -127.37                                                   |
| IM3n                           | 5.25                                       | -117.40                                | -106.11                                | 99.19                                          | -131.06                                               | -125.81                                                   |
| IM4n                           | 1.68                                       | -6.21                                  | 4.60                                   | 100.79                                         | -10.75                                                | -9.07                                                     |
| POZ-n                          | 4.55                                       | 7.16                                   | 21.02                                  | 90.57                                          | -6.17                                                 | -1.62                                                     |
| Formic acid +<br>nBD           | 1.40                                       | -109.47                                | -109.45                                | 136.98                                         | -114.16                                               | -112.76                                                   |
| Formaldehyde +<br>Butyric acid | 1.16                                       | -110.64                                | -110.52                                | 136.65                                         | -117.26                                               | -116.10                                                   |
| Formaldehyde +                 | -0.51                                      | 0.62                                   | 0.95                                   | 135.93                                         | 0.47                                                  | -0.05                                                     |



| Butyraldehyde oxide                      |                                                   |                                        |                                           |                                                |                                          |                                                        |
|------------------------------------------|---------------------------------------------------|----------------------------------------|-------------------------------------------|------------------------------------------------|------------------------------------------|--------------------------------------------------------|
| Ozone + 1-pentene                        | 0.15                                              | 60.84                                  | 61.33                                     | 135.40                                         | 54.09                                    | 54.24                                                  |
| (CH <sub>2</sub> OO + nBD)               |                                                   |                                        |                                           |                                                |                                          |                                                        |
| B3LYP/6-311+G(2df,2p)                    |                                                   |                                        |                                           | CCSD(T)-F12/cc-pVTZ-F12                        |                                          |                                                        |
| Stationary Points                        | $\Delta E_{\text{ZPE}}$<br>kcal mol <sup>-1</sup> | $\Delta H^0$<br>kcal mol <sup>-1</sup> | $\Delta G^0$<br>kcal<br>mol <sup>-1</sup> | $S^0$<br>cal K <sup>-1</sup> mol <sup>-1</sup> | $\Delta E_r^a$<br>kcal mol <sup>-1</sup> | $\Delta E_{r, \text{ZPE}}^b$<br>kcal mol <sup>-1</sup> |
| CH <sub>2</sub> OO + iBD                 |                                                   | 0                                      | 0                                         | 136.65                                         | 0                                        | 0                                                      |
| TS1i                                     | 2.14                                              | -2.38                                  | 10.15                                     | 94.61                                          | -7.95                                    | -5.80                                                  |
| TS2i                                     | -0.58                                             | -1.65                                  | 12.02                                     | 90.80                                          | -11.73                                   | -12.30                                                 |
| TS3i                                     | 1.51                                              | -104.82                                | -91.56                                    | 92.19                                          | -110.91                                  | -109.39                                                |
| TS4i                                     | -0.60                                             | -1.99                                  | 11.84                                     | 90.27                                          | -12.06                                   | -12.66                                                 |
| TS5i                                     | 1.77                                              | -103.75                                | -91.13                                    | 94.33                                          | -110.19                                  | -108.42                                                |
| TS6i                                     | 2.00                                              | -6.30                                  | 6.26                                      | 94.53                                          | -10.50                                   | -8.50                                                  |
| TS7i                                     | 0.15                                              | -4.79                                  | 8.30                                      | 92.73                                          | -8.99                                    | -8.84                                                  |
| TS8i                                     | 0.27                                              | -5.15                                  | 8.35                                      | 91.37                                          | -10.44                                   | -10.17                                                 |
| TS9i                                     | 2.27                                              | 24.81                                  | 38.39                                     | 91.11                                          | 16.47                                    | 18.73                                                  |
| TS10i                                    | 1.47                                              | 61.80                                  | 74.31                                     | 94.69                                          | 56.78                                    | 58.25                                                  |
| IM1i                                     | 1.24                                              | -4.11                                  | 5.35                                      | 104.895                                        | -8.71                                    | -7.47                                                  |
| SOZ-i                                    | 5.30                                              | -41.01                                 | -26.85                                    | 89.157                                         | -56.19                                   | -50.89                                                 |
| IM2i                                     | 5.18                                              | -117.77                                | -104.49                                   | 92.119                                         | -132.30                                  | -127.11                                                |
| IM3i                                     | 5.16                                              | -117.08                                | -105.33                                   | 97.25                                          | -130.16                                  | -125.00                                                |
| IM4i                                     | 1.66                                              | -6.17                                  | 4.78                                      | 99.94                                          | -10.28                                   | -8.62                                                  |
| POZ-i                                    | 4.49                                              | 7.46                                   | 21.62                                     | 89.16                                          | -5.65                                    | -1.17                                                  |
| Formic acid +<br>Isobutyraldehyde        | 1.40                                              | -109.47                                | -109.45                                   | 136.58                                         | -114.16                                  | -112.76                                                |
| Formaldehyde +<br>Isobutyric_acid        | 1.04                                              | -110.97                                | -110.43                                   | 134.84                                         | -116.90                                  | -115.87                                                |
| Formaldehyde +<br>Isobutyraldehyde_oxide | -0.58                                             | 0.61                                   | 1.21                                      | 134.64                                         | 1.20                                     | 0.62                                                   |
| Ozone + Isopentene                       | 0.05                                              | 60.65                                  | 61.27                                     | 134.55                                         | 54.68                                    | 54.73                                                  |

<sup>a</sup>  $\Delta E_r^0$  = Energy change at CCSD(T)-F12/cc-pVTZ-F12

<sup>b</sup>  $\Delta E_{r, \text{ZPE}} = \Delta E_r^0 + \Delta E_{\text{ZPE}}$

**Table S4.** T1-Diagnostics values of reactants, reactive complexes (IM), transition states (TS) and products obtained at CCSD(T)-F12/cc-pVTZ-F12 level of theory.

| <b>Species</b>     | <b>T1-Diagnostic value</b> | <b>Species</b>       | <b>T1-Diagnostic value</b> |
|--------------------|----------------------------|----------------------|----------------------------|
| CH <sub>2</sub> OO | 0.043112131                | iBD                  | 0.012731293                |
| nBD                | 0.012623929                | IM1i                 | 0.027224446                |
| IM1n               | 0.027157005                | SOZ-i                | 0.012617156                |
| SOZ-n              | 0.012549977                | IM2i                 | 0.013609582                |
| IM2n               | 0.013547092                | IM3i                 | 0.013325027                |
| IM3n               | 0.013311760                | IM4i                 | 0.024923300                |
| IM4                | 0.024748782                | POZ-i                | 0.014289088                |
| POZ-n              | 0.014291561                | TS1i                 | 0.026150244                |
| TS1n               | 0.026104868                | TS2i                 | 0.023171854                |
| TS2n               | 0.024182981                | TS3i                 | 0.016862784                |
| TS3n               | 0.016796795                | TS4i                 | 0.028025537                |
| TS4n               | 0.027074759                | TS5i                 | 0.016234474                |
| TS5n               | 0.016184984                | TS6i                 | 0.024417166                |
| TS6n               | 0.024343955                | TS7i                 | 0.032212839                |
| TS7n               | 0.032011717                | TS8i                 | 0.027642102                |
| TS8n               | 0.027464283                | TS9i                 | 0.016919572                |
| TS9n               | 0.017132855                | TS10i                | 0.018328136                |
| TS10n              | 0.017980666                | Isobutyric acid (P6) | 0.013359081                |
| Formic acid (P1)   | 0.016366012                | Isobutyraldehyde     | 0.029453086                |

|                               |             |                 |             |
|-------------------------------|-------------|-----------------|-------------|
|                               |             | oxide (P7)      |             |
| Formaldehyde (P2)             | 0.015418823 | Isopentene (P8) | 0.009874978 |
| Butyric acid (P3)             | 0.013310703 | Ozone           | 0.026341348 |
| N-butyraldehyde<br>oxide (P4) | 0.030034881 |                 |             |
| 1-Pentene (P5)                | 0.009880719 |                 |             |

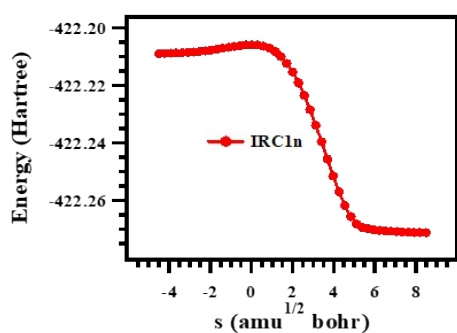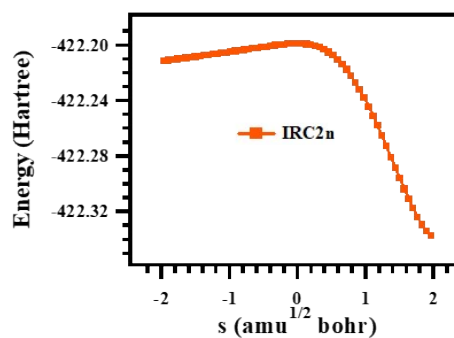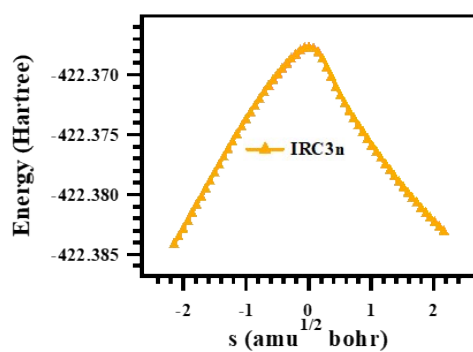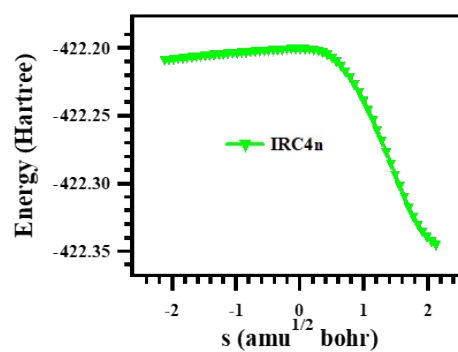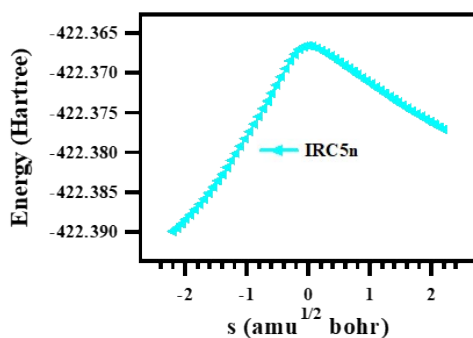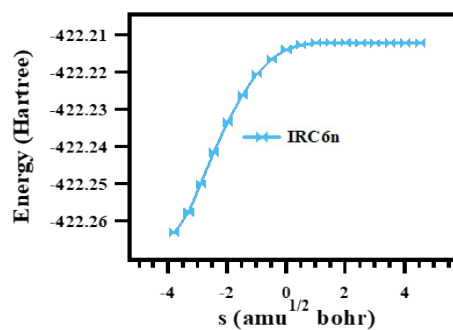

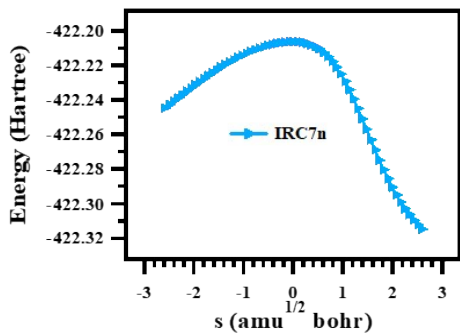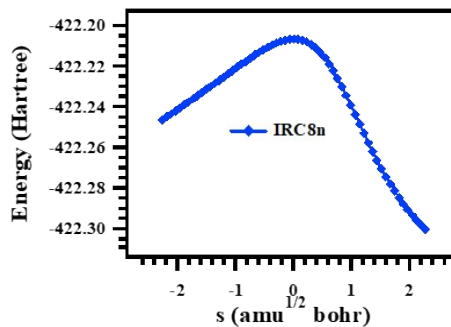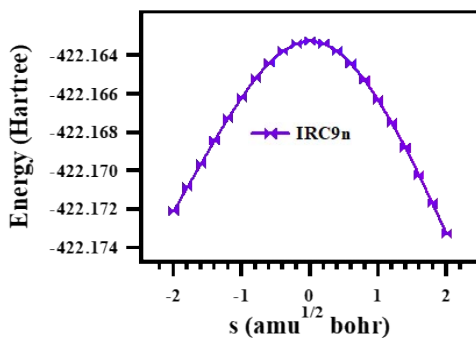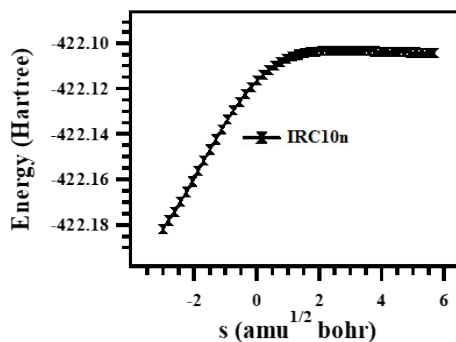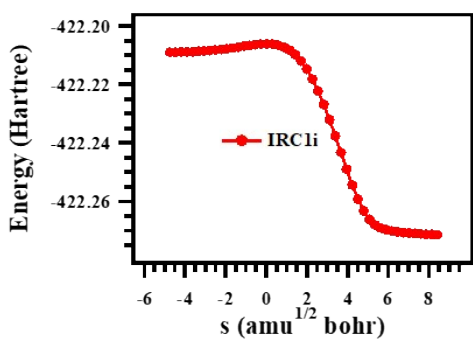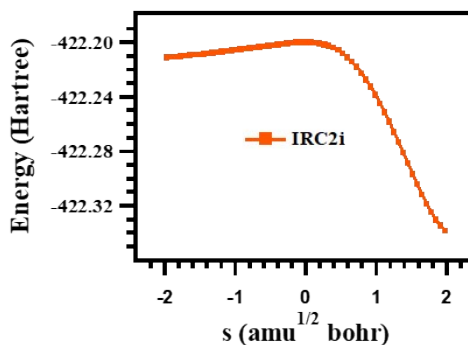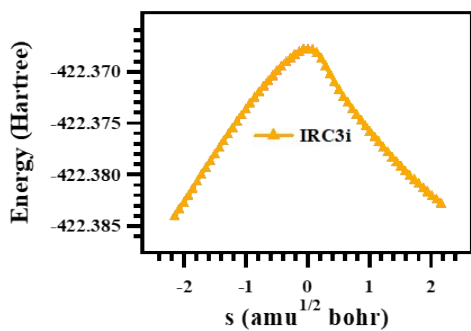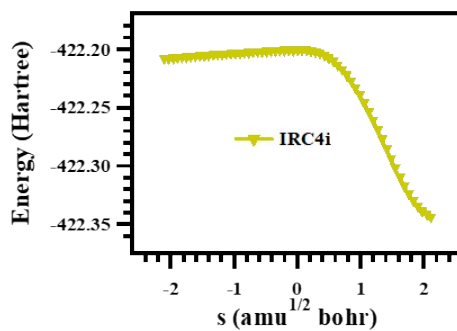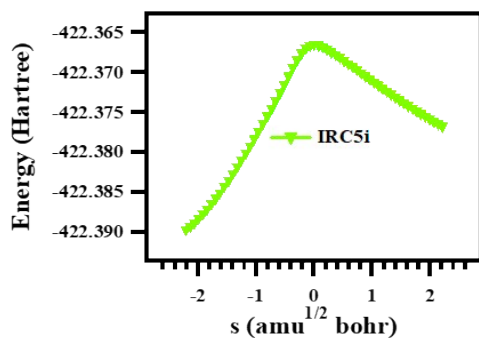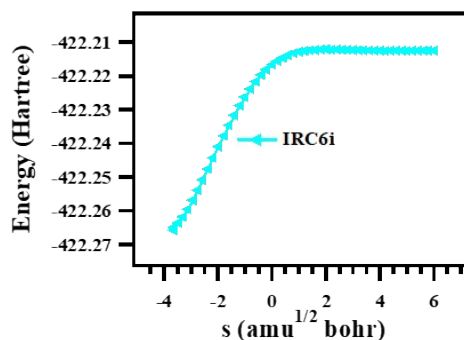

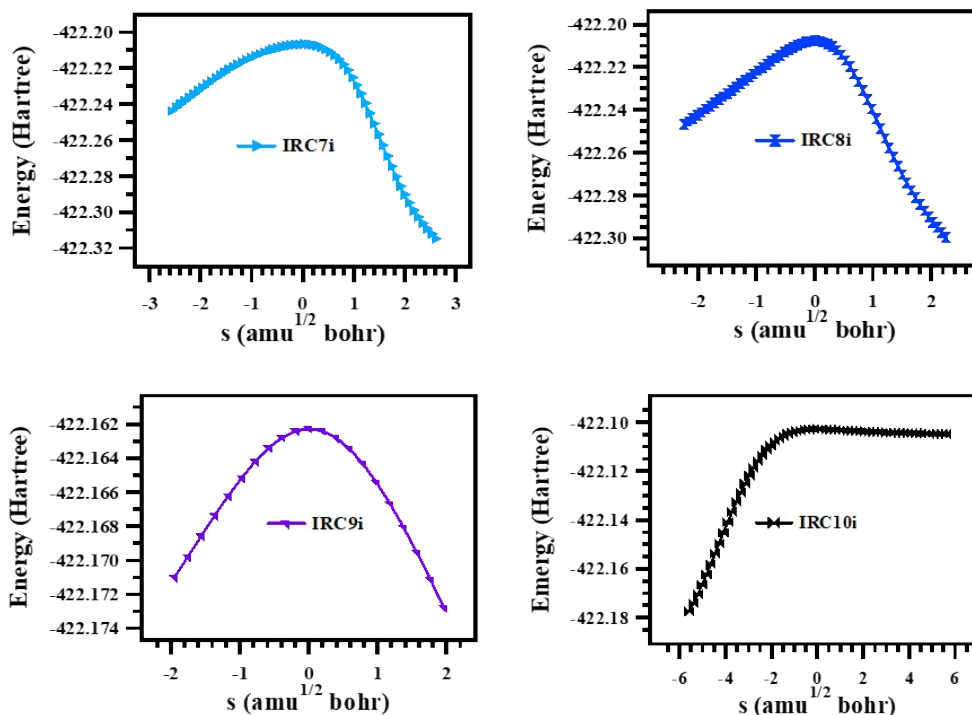

**Figure S2.** Intrinsic Reaction Coordinate (IRC) plots for  $\text{CH}_2\text{OO} + \text{nBD}$  and  $\text{CH}_2\text{OO} + \text{iBD}$  obtained at B3LYP/6-311+G(2df,2p) level of theory. Left side is the reactant and right side is the product well. No fitting was performed.

### Section S2: MESMER Simulation:

Master equation (ME) simulation was performed using MESMER code (6.1), in which the Rice-Ramsperger-Kassel-Marcus (RRKM) theory was employed to treat the consecutive reaction steps.<sup>1,2</sup> ME simulations were performed in lot of studies to determine the temperature and pressure dependent kinetics of  $\text{CH}_2\text{OO}$  reactions and the product distribution, in recent past.<sup>3-5</sup> This simulation involves the distribution of thermal energies among the energy grains for individual states along the PES. The molecular collision enables the energy transfer among these energy grains. The equation for this energy transfer process was given by,

$$\frac{d}{dt}p = Mp \tag{ES1}$$

where,  $p$  is the population vector of the grains and  $M$  is a matrix for the energy transfer rates between grains. For bimolecular reaction in pseudo-1<sup>st</sup> order condition,  $p$  can be expressed as

time population of the reactant which is not in excess concentration in the reaction mixture. Equation ES1 is a standard eigenvalue problem, solving which by diagonalising matrix  $M$ , one gets corresponding set of eigen solutions. The Bartis-Widom<sup>6</sup> method is used by the MESMER code to calculate the phenomenological rate coefficients for the consecutive reaction steps using these set of eigen values.<sup>7,8</sup>

Exponential down model was employed in order to describe the collisional energy transfer process as per the equation,

$$\langle \Delta E \rangle_{down,T} = \langle \Delta E \rangle_{down,298K} \left( \frac{T}{300} \right)^n \quad (\text{ES2})$$

where,  $\langle \Delta E \rangle_{down,T}$  is the downward energy transfer due to the collision of the reactants to the bath gas molecules,  $\langle \Delta E \rangle_{down,298K}$  is the standard value at 298 K for a specific bath gas,  $n$  is a constant specific to each bath gas. The values of the latter two constants for  $N_2$  were  $200 \text{ cm}^{-1}$  and  $0.85$ .<sup>9,10</sup> The L-J parameters for the bath gas ( $N_2$ ) was set to be default as in the MESMER code, and for the intermediates, were calculated using following equations<sup>11</sup>,

$$\sigma = 2.44 \left( \frac{T_c}{p_c} \right)^{\frac{1}{3}} \quad (\text{ES3})$$

$$\epsilon = 0.77kT_c \quad (\text{ES4})$$

The critical constants for temperature and pressure in Equation ES4 were calculated using Joback's group contribution method for the intermediates.<sup>12</sup> The  $\sigma$  and  $\epsilon$  values calculated are given in Table S5.

**Table S5.** The L-J parameters calculated.

| Species                  | $\sigma$ (in Å) | $\epsilon$ (in kT) | Species                  | $\sigma$ (in Å) | $\epsilon$ (in kT) |
|--------------------------|-----------------|--------------------|--------------------------|-----------------|--------------------|
| CH <sub>2</sub> OO + nBD |                 |                    | CH <sub>2</sub> OO + iBD |                 |                    |

|     |      |        |     |      |        |
|-----|------|--------|-----|------|--------|
| IM1 | 5.89 | 454.88 | IM1 | 5.90 | 459.99 |
| SOZ | 5.89 | 454.88 | SOZ | 5.90 | 459.99 |
| IM2 | 5.88 | 452.31 | IM2 | 5.88 | 457.40 |
| IM3 | 5.95 | 434.55 | IM3 | 5.99 | 448.23 |

The entrance channel for the title reactions is the bimolecular association of the CH<sub>2</sub>OO to the C=O group of the nBD and iBD. This association step is a barrierless process, and is treated using Inverse Laplace Transformation (ILT), included in the MESMER code. The Arrhenius parameters used for the ILT method were taken from the linear least-square fit of the experimental data as per Equation ES5.

$$k(T) = A \left( \frac{T}{298K} \right)^n \quad (\text{ES5})$$

The values for A and n were taken to be  $2.53 \times 10^{-12} \text{ cm}^3 \text{ molecule}^{-1} \text{ s}^{-1}$  and -1.49 respectively for R4 and  $2.14 \times 10^{-12} \text{ cm}^3 \text{ molecule}^{-1} \text{ s}^{-1}$  and -1.49 respectively for R5. It should be noted that the value n from the fit obtained were 3.16 and 3.62 for R4 and R5 respectively, but MESMER code allows the lowest value of -1.49. Hence the highest possible negative curvature with n = -1.49 was employed the ILT method. Whereas, the excess concentration values for nBD and iBD were  $1.13 \times 10^{15}$  and  $1.14 \times 10^{15} \text{ molecule cm}^{-3}$  respectively. The MESMER parameters namely “energy above the Top hill” and “Energy grain” were assigned to be 25 kT and 40 cm<sup>-1</sup> respectively.

**Table S6.** Pseudo-1<sup>st</sup> order rate coefficients at temperatures in the range of 253-318 K for (a) CH<sub>2</sub>OO + nBD and (b) CH<sub>2</sub>OO + iBD reactions, respectively. Standard deviations are given in 1σ obtained from the fittings in Figure 1.

| <b>(a) CH<sub>2</sub>OO + nBD</b>                                 |                                                           |                                                           |                                                           |                                                           |                                                           |                                                           |
|-------------------------------------------------------------------|-----------------------------------------------------------|-----------------------------------------------------------|-----------------------------------------------------------|-----------------------------------------------------------|-----------------------------------------------------------|-----------------------------------------------------------|
| <b>[nBD]</b><br><b>(10<sup>15</sup> molecule cm<sup>-3</sup>)</b> | $k_{pseudo}^{253 K} \pm 2\sigma$<br><b>s<sup>-1</sup></b> | $k_{pseudo}^{268 K} \pm 2\sigma$<br><b>s<sup>-1</sup></b> | $k_{pseudo}^{283 K} \pm 2\sigma$<br><b>s<sup>-1</sup></b> | $k_{pseudo}^{298 K} \pm 2\sigma$<br><b>s<sup>-1</sup></b> | $k_{pseudo}^{308 K} \pm 2\sigma$<br><b>s<sup>-1</sup></b> | $k_{pseudo}^{318 K} \pm 2\sigma$<br><b>s<sup>-1</sup></b> |
| <b>0.38</b>                                                       | 3386.3<br>± 65.0                                          | 3524.0<br>± 73.9                                          | 3328.9<br>± 66.0                                          | 3049.9<br>± 83.5                                          | 2769.8<br>± 68.3                                          | 2451.7<br>± 86.6                                          |
| <b>0.76</b>                                                       | 5370.0<br>± 216.0                                         | 4732.0<br>± 227.0                                         | 5362.5<br>± 68.6                                          | 3805.4<br>± 76.9                                          | 3520.7<br>± 71.2                                          | 3143.7<br>± 59.1                                          |
| <b>1.13</b>                                                       | 6807.5<br>± 261.0                                         | 6173.4<br>± 186.0                                         | 5306.2<br>± 105.5                                         | 4756.3<br>± 135.0                                         | 4288.4<br>± 137.0                                         | 3791.1<br>± 104.0                                         |
| <b>1.49</b>                                                       | 8282.4<br>± 357.0                                         | 4799.4<br>± 305.0                                         | 6386.2<br>± 192.0                                         | 5852.7<br>± 111.0                                         | 5004.2<br>± 104.0                                         | 4601.7<br>± 111.0                                         |
| <b>1.85</b>                                                       | 9765.9<br>± 532.0                                         | 8850.0<br>± 153.0                                         | 7467.5<br>± 369.0                                         | 6753.3<br>± 207.0                                         | 5908.6<br>± 144.0                                         | 5266.2<br>± 137.0                                         |
| <b>2.20</b>                                                       | 11180.0<br>± 518.0                                        | 10003<br>± 310.0                                          | 8884.4<br>± 278.0                                         | 7782.2<br>± 205.0                                         | 6928.4<br>± 150.0                                         | 6106.9<br>± 214.0                                         |
| <b>(b) CH<sub>2</sub>OO + iBD</b>                                 |                                                           |                                                           |                                                           |                                                           |                                                           |                                                           |
| <b>[iBD] (10<sup>15</sup> molecule cm<sup>-3</sup>)</b>           | $k_{pseudo}^{253 K} \pm 2\sigma$<br><b>s<sup>-1</sup></b> | $k_{pseudo}^{268 K} \pm 2\sigma$<br><b>s<sup>-1</sup></b> | $k_{pseudo}^{283 K} \pm 2\sigma$<br><b>s<sup>-1</sup></b> | $k_{pseudo}^{298 K} \pm 2\sigma$<br><b>s<sup>-1</sup></b> | $k_{pseudo}^{308 K} \pm 2\sigma$<br><b>s<sup>-1</sup></b> | $k_{pseudo}^{318 K} \pm 2\sigma$<br><b>s<sup>-1</sup></b> |
| <b>0.38</b>                                                       | 3146.9<br>± 85.5                                          | 3122.0<br>± 58.3                                          | 3053.3<br>± 54.4                                          | 3020.1<br>± 124.0                                         | 2944.6<br>± 34.9                                          | 2871.4<br>± 86.6                                          |
| <b>0.76</b>                                                       | 4349.9<br>± 244.0                                         | 4029.1<br>± 113.0                                         | 3881.4<br>± 87.4                                          | 3775.4<br>± 123.0                                         | 3512.1<br>± 41.9                                          | 3348.0<br>± 126.0                                         |
| <b>1.14</b>                                                       | 5892.6                                                    | 5193.6                                                    | 4714.4                                                    | 4340.2                                                    | 4135.6                                                    | 3881.1                                                    |



|             |                        |                       |                       |                       |                       |                       |
|-------------|------------------------|-----------------------|-----------------------|-----------------------|-----------------------|-----------------------|
|             | $\pm 314.0$            | $\pm 500.0$           | $\pm 245.0$           | $\pm 180.0$           | $\pm 92.1$            | $\pm 75.6$            |
| <b>1.52</b> | 7214.8<br>$\pm 358.0$  | 6239.3<br>$\pm 361.0$ | 5786.6<br>$\pm 448.0$ | 5251.5<br>$\pm 180.0$ | 4855.6<br>$\pm 80.0$  | 4480.2<br>$\pm 120.0$ |
| <b>1.89</b> | 8691.9<br>$\pm 262.0$  | 7679.1<br>$\pm 344.0$ | 6978.4<br>$\pm 372.0$ | 6213.1<br>$\pm 195.0$ | 5715.2<br>$\pm 221.0$ | 5166.4<br>$\pm 78.7$  |
| <b>2.26</b> | 10390.0<br>$\pm 591.0$ | 9029.9<br>$\pm 471.0$ | 8042.9<br>$\pm 172.0$ | 7160.0<br>$\pm 253.0$ | 6416.3<br>$\pm 226.0$ | 5946.4<br>$\pm 116.0$ |

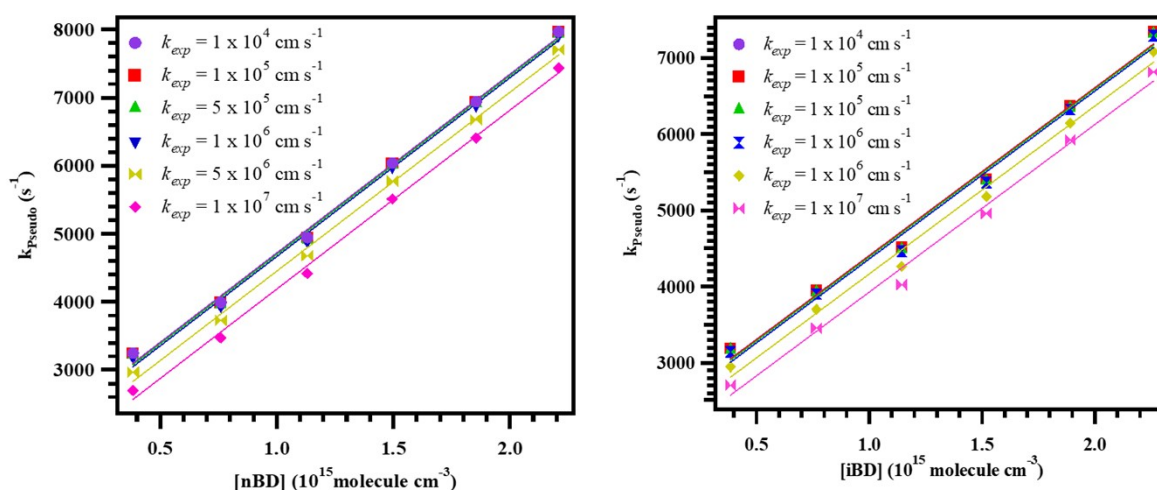

**Figure S3. Sensitivity analysis of  $k_{\text{exp}}$  on the bimolecular rate coefficients.**

### Section S3. Thermochemistry:

The change in free energy ( $\Delta G^0$ ), enthalpy ( $\Delta H^0$ ) and entropy ( $\Delta S^0$ ) for all the reaction pathways are given in Table S7. There are identical products formed in different pathways, such as Pathways 1 and 4 and Pathways 2 and 5, which give the same thermodynamic parameters. Highly negative free energies for Pathways 1, 2, 4 and 5 make them thermodynamically favourable over Pathways 3 and 6. Again, only the net change of free energy or enthalpy does not provide a clear picture of the feasibility of the pathways. These pathways contain several consecutive steps, each of which behaves thermodynamically

different. The thermodynamic parameters for each consecutive pathway are given in Table S7. It is worth mentioning that there exists an equilibrium between the reactants and the vdW complexes, which is common in reactions associated with loose TSs, as in this case. The formation of vdW complexes, namely IM1n ( $\Delta H^0 = -4.25 \text{ kcal mol}^{-1}$ ) and IM1i ( $\Delta H^0 = -4.11 \text{ kcal mol}^{-1}$ ), were found to be exothermic in nature, which governs how the equilibrium changes with the temperature.

**Table S7.** Thermochemical parameters obtained at B3LYP/6-311+G(2df,2p) level, for reactions R4 and R5. All parameters are given in kcal mol<sup>-1</sup>.

| CH <sub>2</sub> OO + nBD |              |              |                | CH <sub>2</sub> OO + iBD |              |              |                |
|--------------------------|--------------|--------------|----------------|--------------------------|--------------|--------------|----------------|
| Pathways                 | $\Delta G^0$ | $\Delta H^0$ | T $\Delta S^0$ | Pathways                 | $\Delta G^0$ | $\Delta H^0$ | T $\Delta S^0$ |
| Pathway                  |              |              |                | Pathway                  |              |              |                |
| 1 & 4                    | -109.45      | -109.47      | -0.02          | 1 & 4                    | -109.45      | -109.47      | -0.02          |
| Pathway                  |              |              |                | Pathway                  |              |              |                |
| 2 & 5                    | -110.52      | -110.64      | -0.12          | 2 & 5                    | -110.43      | -110.97      | -0.12          |
| Pathway 3                | 0.95         | 0.62         | -0.33          | Pathway 3                | 1.21         | 0.61         | -0.33          |
| Pathway 6                | 61.33        | 60.84        | -0.49          | Pathway 6                | 61.27        | 60.65        | -0.49          |

**Table S8.** Equilibrium constant for the reaction CH<sub>2</sub>OO + nBD  $\leftrightarrow$  IM1n and CH<sub>2</sub>OO + iBD  $\leftrightarrow$  IM1i calculated at B3LYP/6-311+G(2df,2p) level of theory.

| Temperature (K) | $K_{eq}^{nBD}$ (cm <sup>3</sup> molecule <sup>-1</sup> ) | $K_{eq}^{iBD}$ (cm <sup>3</sup> molecule <sup>-1</sup> ) |
|-----------------|----------------------------------------------------------|----------------------------------------------------------|
|-----------------|----------------------------------------------------------|----------------------------------------------------------|

|     |                        |                        |
|-----|------------------------|------------------------|
| 200 | $1.63 \times 10^{-18}$ | $2.55 \times 10^{-19}$ |
| 225 | $1.83 \times 10^{-19}$ | $3.56 \times 10^{-20}$ |
| 250 | $3.19 \times 10^{-20}$ | $7.42 \times 10^{-21}$ |
| 275 | $8.17 \times 10^{-21}$ | $2.20 \times 10^{-21}$ |
| 298 | $2.86 \times 10^{-21}$ | $8.58 \times 10^{-22}$ |
| 325 | $1.02 \times 10^{-21}$ | $3.44 \times 10^{-22}$ |
| 350 | $4.64 \times 10^{-22}$ | $1.70 \times 10^{-22}$ |

**Table S9.** Calculated CVT and CVT/SCT rate coefficients showing the tunnelling effect for IM1  $\rightarrow$  SOZ step in both the reactions.

| Temp       | IM1n $\rightarrow$ SOZ-n           |                                        | IM1i $\rightarrow$ SOZ-i           |                                        |
|------------|------------------------------------|----------------------------------------|------------------------------------|----------------------------------------|
|            | $k_{uni}^{CVT}$ (s <sup>-1</sup> ) | $k_{uni}^{CVT/SCT}$ (s <sup>-1</sup> ) | $k_{uni}^{CVT}$ (s <sup>-1</sup> ) | $k_{uni}^{CVT/SCT}$ (s <sup>-1</sup> ) |
| <b>200</b> | $2.22 \times 10^{08}$              | $2.41 \times 10^{09}$                  | $2.22 \times 10^{08}$              | $2.41 \times 10^{09}$                  |
| <b>225</b> | $4.34 \times 10^{08}$              | $2.70 \times 10^{09}$                  | $4.34 \times 10^{08}$              | $2.70 \times 10^{09}$                  |
| <b>250</b> | $7.33 \times 10^{08}$              | $3.05 \times 10^{09}$                  | $7.33 \times 10^{08}$              | $3.05 \times 10^{09}$                  |
| <b>268</b> | $9.99 \times 10^{08}$              | $3.34 \times 10^{09}$                  | $9.99 \times 10^{08}$              | $3.34 \times 10^{09}$                  |
| <b>275</b> | $1.11 \times 10^{09}$              | $3.46 \times 10^{09}$                  | $1.11 \times 10^{09}$              | $3.46 \times 10^{09}$                  |
| <b>298</b> | $1.53 \times 10^{09}$              | $3.86 \times 10^{09}$                  | $1.53 \times 10^{09}$              | $3.86 \times 10^{09}$                  |
| <b>300</b> | $1.57 \times 10^{09}$              | $3.90 \times 10^{09}$                  | $1.57 \times 10^{09}$              | $3.90 \times 10^{09}$                  |
| <b>325</b> | $2.08 \times 10^{09}$              | $4.36 \times 10^{09}$                  | $2.08 \times 10^{09}$              | $4.36 \times 10^{09}$                  |
| <b>350</b> | $2.64 \times 10^{09}$              | $4.83 \times 10^{09}$                  | $2.64 \times 10^{09}$              | $4.83 \times 10^{09}$                  |

**Table S10.** Rate coefficients for the reaction of CH<sub>2</sub>OO + nBD and CH<sub>2</sub>OO + iBD obtained from CVT/SCT and MESMER calculations.

| Temperature<br>(K) | CH <sub>2</sub> OO + nBD                                                            |                                                                                 | CH <sub>2</sub> OO + iBD                                                            |                                                                                 |
|--------------------|-------------------------------------------------------------------------------------|---------------------------------------------------------------------------------|-------------------------------------------------------------------------------------|---------------------------------------------------------------------------------|
|                    | $k_{nBD}^{CVT/SCT-HR}$<br>(cm <sup>3</sup> molecule <sup>-1</sup> s <sup>-1</sup> ) | $k_{nBD}^{MESMER}$<br>(cm <sup>3</sup> molecule <sup>-1</sup> s <sup>-1</sup> ) | $k_{iBD}^{CVT/SCT-HR}$<br>(cm <sup>3</sup> molecule <sup>-1</sup> s <sup>-1</sup> ) | $k_{iBD}^{MESMER}$<br>(cm <sup>3</sup> molecule <sup>-1</sup> s <sup>-1</sup> ) |
| 200                | $4.80 \times 10^{-10}$                                                              | $4.00 \times 10^{-12}$                                                          | $6.07 \times 10^{-10}$                                                              | $3.37 \times 10^{-12}$                                                          |
| 225                | $1.04 \times 10^{-10}$                                                              | $3.20 \times 10^{-12}$                                                          | $9.49 \times 10^{-11}$                                                              | $2.60 \times 10^{-12}$                                                          |
| 250                | $3.05 \times 10^{-11}$                                                              | $2.59 \times 10^{-12}$                                                          | $2.23 \times 10^{-11}$                                                              | $2.04 \times 10^{-12}$                                                          |
| 275                | $1.19 \times 10^{-11}$                                                              | $2.12 \times 10^{-12}$                                                          | $7.48 \times 10^{-12}$                                                              | $1.61 \times 10^{-12}$                                                          |
| 298                | $5.62 \times 10^{-12}$                                                              | $1.78 \times 10^{-12}$                                                          | $3.26 \times 10^{-12}$                                                              | $1.31 \times 10^{-12}$                                                          |
| 325                | $2.73 \times 10^{-12}$                                                              | $1.45 \times 10^{-12}$                                                          | $1.47 \times 10^{-12}$                                                              | $1.04 \times 10^{-12}$                                                          |
| 350                | $1.56 \times 10^{-12}$                                                              | $1.22 \times 10^{-12}$                                                          | $8.07 \times 10^{-13}$                                                              | $8.42 \times 10^{-13}$                                                          |

#### Section S4. Error Propagation:

The experimental error associated with the measurement of the concentration of the sample (nBD/iBD) was propagated to get the upper and lower limit of the rate coefficients. The maximum possible error due to the flow calibration through the MFCs, in the concentration measurement was assumed to be  $\pm 10\%$ . The upper and lower limit of the rate coefficients were determined by plotting the corresponding  $k_{pseudo}$  values against the concentration ( $\pm 10\%$ ) of nBD and iBD, which are given in Table S11.

**Table S11.** Error ( $Ek_n$ ) propagation of the reactions CH<sub>2</sub>OO + nBD and CH<sub>2</sub>OO + iBD.

| T | CH <sub>2</sub> OO + nBD                                   |                      |                       | CH <sub>2</sub> OO + iBD |                      |                       |
|---|------------------------------------------------------------|----------------------|-----------------------|--------------------------|----------------------|-----------------------|
|   | $k_{nBD}$                                                  | $k_{nBD} (\pm 10\%)$ | $Ek_{nBD} (\pm 10\%)$ | $k_{iBD}$                | $k_{iBD} (\pm 10\%)$ | $Ek_{iBD} (\pm 10\%)$ |
| K | <b>cm<sup>3</sup> molecule<sup>-1</sup> s<sup>-1</sup></b> |                      |                       |                          |                      |                       |

| (Concentration -10%) |                        |                        |                        |                        |                        |                        |
|----------------------|------------------------|------------------------|------------------------|------------------------|------------------------|------------------------|
| 253                  | $4.20 \times 10^{-12}$ | $4.66 \times 10^{-12}$ | $9.22 \times 10^{-13}$ | $3.86 \times 10^{-12}$ | $4.28 \times 10^{-12}$ | $4.20 \times 10^{-13}$ |
| 268                  | $3.61 \times 10^{-12}$ | $4.00 \times 10^{-12}$ | $7.85 \times 10^{-13}$ | $3.16 \times 10^{-12}$ | $3.51 \times 10^{-12}$ | $3.55 \times 10^{-13}$ |
| 283                  | $2.99 \times 10^{-12}$ | $3.31 \times 10^{-12}$ | $6.48 \times 10^{-13}$ | $2.65 \times 10^{-12}$ | $2.99 \times 10^{-12}$ | $3.38 \times 10^{-13}$ |
| 298                  | $2.63 \times 10^{-12}$ | $2.92 \times 10^{-12}$ | $5.75 \times 10^{-13}$ | $2.20 \times 10^{-12}$ | $2.45 \times 10^{-12}$ | $2.47 \times 10^{-13}$ |
| 308                  | $2.24 \times 10^{-12}$ | $2.49 \times 10^{-12}$ | $4.99 \times 10^{-13}$ | $1.88 \times 10^{-12}$ | $2.09 \times 10^{-12}$ | $2.09 \times 10^{-13}$ |
| 318                  | $1.99 \times 10^{-12}$ | $2.21 \times 10^{-12}$ | $4.40 \times 10^{-13}$ | $1.63 \times 10^{-12}$ | $1.81 \times 10^{-12}$ | $1.83 \times 10^{-13}$ |
| (Concentration +10%) |                        |                        |                        |                        |                        |                        |
| 253                  | $4.20 \times 10^{-12}$ | $3.82 \times 10^{-12}$ | $7.68 \times 10^{-13}$ | $3.86 \times 10^{-12}$ | $3.50 \times 10^{-12}$ | $3.59 \times 10^{-13}$ |
| 268                  | $3.61 \times 10^{-12}$ | $3.28 \times 10^{-12}$ | $6.66 \times 10^{-13}$ | $3.16 \times 10^{-12}$ | $2.88 \times 10^{-12}$ | $2.84 \times 10^{-13}$ |
| 283                  | $2.99 \times 10^{-12}$ | $2.71 \times 10^{-12}$ | $5.53 \times 10^{-13}$ | $2.65 \times 10^{-12}$ | $2.44 \times 10^{-12}$ | $2.05 \times 10^{-13}$ |
| 298                  | $2.63 \times 10^{-12}$ | $2.39 \times 10^{-12}$ | $4.82 \times 10^{-13}$ | $2.20 \times 10^{-12}$ | $2.00 \times 10^{-12}$ | $1.98 \times 10^{-13}$ |
| 308                  | $2.24 \times 10^{-12}$ | $2.04 \times 10^{-12}$ | $4.04 \times 10^{-13}$ | $1.88 \times 10^{-12}$ | $1.71 \times 10^{-12}$ | $1.71 \times 10^{-13}$ |
| 318                  | $1.99 \times 10^{-12}$ | $1.81 \times 10^{-12}$ | $3.61 \times 10^{-13}$ | $1.63 \times 10^{-12}$ | $1.48 \times 10^{-12}$ | $1.47 \times 10^{-13}$ |

These uncertainties are given as error bars in Figure 5 of the manuscript where Figure 2 reflects only fitting error comes from the temporal profiles of CH<sub>2</sub>OO in Figure 1.

**Table S12.** Rate coefficients obtained from MESMER calculations for product formation pathways from SOZs at 760 Torr.

| Temperature | $k_{MESMER}^{SOZ-n \rightarrow P}$ (s <sup>-1</sup> ) |                        |                        |                        |                        |
|-------------|-------------------------------------------------------|------------------------|------------------------|------------------------|------------------------|
|             | Pathway 1                                             | Pathway 2              | Pathway 3              | Pathway 4              | Pathway 5              |
| 200         | $1.36 \times 10^{-06}$                                | $1.38 \times 10^{-05}$ | $1.05 \times 10^{-30}$ | $8.17 \times 10^{-31}$ | $4.67 \times 10^{-27}$ |
| 225         | $1.48 \times 10^{-04}$                                | $7.94 \times 10^{-04}$ | $2.09 \times 10^{-31}$ | $1.82 \times 10^{-28}$ | $1.32 \times 10^{-24}$ |

|                    |                                             |                        |                        |                        |                        |
|--------------------|---------------------------------------------|------------------------|------------------------|------------------------|------------------------|
| <b>250</b>         | $7.94 \times 10^{-04}$                      | $2.25 \times 10^{-02}$ | $2.87 \times 10^{-24}$ | $3.91 \times 10^{-24}$ | $7.00 \times 10^{-22}$ |
| <b>275</b>         | $1.49 \times 10^{-01}$                      | $3.68 \times 10^{-01}$ | $8.08 \times 10^{-21}$ | $8.72 \times 10^{-21}$ | $3.63 \times 10^{-19}$ |
| <b>298</b>         | $1.70 \times 10^{00}$                       | $3.29 \times 10^{00}$  | $3.64 \times 10^{-18}$ | $3.42 \times 10^{-18}$ | $6.96 \times 10^{-17}$ |
| <b>325</b>         | $1.92 \times 10^{01}$                       | $2.97 \times 10^{01}$  | $1.61 \times 10^{-15}$ | $1.34 \times 10^{-15}$ | $1.60 \times 10^{-14}$ |
| <b>350</b>         | $1.31 \times 10^{02}$                       | $1.71 \times 10^{02}$  | $1.99 \times 10^{-13}$ | $1.51 \times 10^{-13}$ | $1.28 \times 10^{-12}$ |
| <b>375</b>         | $6.96 \times 10^{02}$                       | $7.86 \times 10^{02}$  | $1.30 \times 10^{-11}$ | $9.25 \times 10^{-12}$ | $6.06 \times 10^{-11}$ |
| <b>400</b>         | $2.99 \times 10^{03}$                       | $3.01 \times 10^{03}$  | $5.10 \times 10^{-10}$ | $3.43 \times 10^{-10}$ | $1.83 \times 10^{-09}$ |
| <b>Temperature</b> | $k_{MESMER}^{SOZ-i \rightarrow P} (s^{-1})$ |                        |                        |                        |                        |
|                    | <b>Pathway 1</b>                            | <b>Pathway 2</b>       | <b>Pathway 3</b>       | <b>Pathway 4</b>       | <b>Pathway 5</b>       |
| <b>200</b>         | $1.56 \times 10^{-06}$                      | $2.12 \times 10^{-05}$ | $2.35 \times 10^{-31}$ | $1.08 \times 10^{-31}$ | $1.82 \times 10^{-26}$ |
| <b>225</b>         | $1.58 \times 10^{-04}$                      | $1.08 \times 10^{-03}$ | $5.83 \times 10^{-28}$ | $1.13 \times 10^{-27}$ | $4.15 \times 10^{-24}$ |
| <b>250</b>         | $6.65 \times 10^{-03}$                      | $2.78 \times 10^{-02}$ | $1.99 \times 10^{-24}$ | $5.27 \times 10^{-24}$ | $1.81 \times 10^{-21}$ |
| <b>275</b>         | $1.47 \times 10^{-01}$                      | $4.24 \times 10^{-01}$ | $5.74 \times 10^{-21}$ | $1.14 \times 10^{-20}$ | $8.19 \times 10^{-19}$ |
| <b>298</b>         | $1.64 \times 10^{00}$                       | $3.59 \times 10^{00}$  | $2.68 \times 10^{-18}$ | $4.43 \times 10^{-18}$ | $1.45 \times 10^{-16}$ |
| <b>325</b>         | $1.82 \times 10^{01}$                       | $3.08 \times 10^{01}$  | $1.23 \times 10^{-15}$ | $1.71 \times 10^{-15}$ | $3.10 \times 10^{-14}$ |
| <b>350</b>         | $1.23 \times 10^{02}$                       | $1.70 \times 10^{02}$  | $1.55 \times 10^{-13}$ | $1.92 \times 10^{-13}$ | $2.36 \times 10^{-12}$ |
| <b>375</b>         | $6.46 \times 10^{03}$                       | $7.54 \times 10^{02}$  | $1.04 \times 10^{-11}$ | $1.16 \times 10^{-11}$ | $1.07 \times 10^{-10}$ |
| <b>400</b>         | $2.88 \times 10^{03}$                       | $2.80 \times 10^{03}$  | $4.14 \times 10^{-10}$ | $4.29 \times 10^{-10}$ | $3.11 \times 10^{-09}$ |

### Section S5. Cumulative Atmospheric Lifetime:

$$\frac{1}{T_{cum}} = \frac{1}{T_{OH}} + \frac{1}{T_{Cl(MBI)}} + \frac{1}{T_{CH_2OO}} \quad (ES6)$$

$$\tau_x = \frac{1}{([x] \times k_x)} \quad (ES7)$$

Where,  $\tau_x$  is the atmospheric lifetime,  $[x]$  is the mixing ratio and  $k_x$  is the corresponding rate coefficient. The mixing ratio values considered in this calculation were  $[\text{OH}] = 1.0 \times 10^6$  molecule  $\text{cm}^{-3}$  <sup>13</sup>,  $[\text{Cl}(\text{MBL})] = 1.3 \times 10^5$  molecule  $\text{cm}^{-3}$  <sup>14</sup>,  $[\text{CH}_2\text{OO}] = 10^4$  molecule  $\text{cm}^{-3}$  <sup>15</sup> and the rate coefficients were  $k(\text{OH} + \text{nBD}) = 5.7 \times 10^{-12} \times \exp\{411/T\}$  and  $k(\text{OH} + \text{iBD}) = 6.8 \times 10^{-12} \times \exp\{393/T\}$   $\text{cm}^3$  molecule<sup>-1</sup> s<sup>-1</sup> <sup>16</sup>,  $k(\text{Cl} + \text{nBD}) = 3.09 \times 10^{-11} \times \exp\{446/T\}$   $\text{cm}^3$  molecule<sup>-1</sup> s<sup>-1</sup> <sup>17</sup>,  $k(\text{CH}_2\text{OO} + \text{nBD}) = 11.51 \times 10^{-14} \times \exp\{918.1/T\}$  and  $k(\text{CH}_2\text{OO} + \text{iBD}) = 6.23 \times 10^{-14} \times \exp\{1051.4/T\}$   $\text{cm}^3$  molecule<sup>-1</sup> s<sup>-1</sup> (this study). The rate coefficients for Cl + iBD were taken to be same as for Cl + nBD, as there were no temperature dependent rate coefficients available for the same.

**Table S13.** Comparison of the rate of the reactions  $\text{CH}_2\text{OO} + \text{nBD}$  with  $\text{OH} + \text{nBD}$  and  $\text{CH}_2\text{OO} + \text{iBD}$  with  $\text{OH} + \text{iBD}$ .

| Rate ratio( $\nu$ )<br>$\text{CH}_2\text{OO} + \text{nBD}$ |                    | [OH] (molecule $\text{cm}^{-3}$ ) |                    |                    |
|------------------------------------------------------------|--------------------|-----------------------------------|--------------------|--------------------|
|                                                            |                    | $1.00 \times 10^4$                | $1.00 \times 10^5$ | $1.00 \times 10^6$ |
| [CH <sub>2</sub> OO]<br>(molecule $\text{cm}^{-3}$ )       | $1.00 \times 10^4$ | 0.1162                            | 0.01162            | 0.001162           |
|                                                            | $5.00 \times 10^4$ | 0.581                             | 0.0581             | 0.00581            |
|                                                            | $1.00 \times 10^5$ | 1.162                             | 0.1162             | 0.01162            |

| Rate ratio( $\nu$ )<br>$\text{CH}_2\text{OO} + \text{iBD}$ |                    | [OH] (molecule $\text{cm}^{-3}$ ) |                    |                    |
|------------------------------------------------------------|--------------------|-----------------------------------|--------------------|--------------------|
|                                                            |                    | $1.00 \times 10^4$                | $1.00 \times 10^5$ | $1.00 \times 10^6$ |
| [CH <sub>2</sub> OO]<br>(molecule $\text{cm}^{-3}$ )       | $1.00 \times 10^4$ | 0.0865                            | 0.00865            | 0.000865           |
|                                                            | $5.00 \times 10^4$ | 0.4325                            | 0.04325            | 0.004325           |
|                                                            | $1.00 \times 10^5$ | 0.865                             | 0.0865             | 0.00865            |

Where,

$$v = \frac{k_{(CH_2OO+s)}[CH_2OO][s]}{k_{(OH+s)}[OH][s]} = \frac{k_{(CH_2OO+s)}[CH_2OO]}{k_{(OH+s)}s[OH]}$$

(ES8)

The rate coefficients used are,  $k^{298\text{ K}}(\text{OH} + \text{nBD}) = 2.26 \times 10^{-11}$  and  $k^{298\text{ K}}(\text{OH} + \text{iBD}) = 2.54 \times 10^{-11} \text{ cm}^3 \text{ molecule}^{-1} \text{ s}^{-1}$ <sup>15</sup>,  $k^{298\text{ K}}(\text{CH}_2\text{OO} + \text{nBD}) = 2.63 \times 10^{-12}$  and  $k^{298\text{ K}}(\text{CH}_2\text{OO} + \text{iBD}) = 2.20 \times 10^{-11} \text{ cm}^3 \text{ molecule}^{-1} \text{ s}^{-1}$  (this study).

## References:

1. K. W. McKee, M. A. Blitz, P. A. Cleary, D. R. Glowacki, M. J. Pilling, P. W. Seakins and L. Wang, *J. Phys. Chem. A*, 2007, **111**, 4043-4055. [doi.org/10.1021/jp067594y](https://doi.org/10.1021/jp067594y)
2. D. R. Glowacki, C. H. Liang, C. Morley, M. J. Pilling and S. H. Robertson, *J. Phys. Chem. A*, 2012, **116**, 9545-9560. [doi.org/10.1021/jp3051033](https://doi.org/10.1021/jp3051033).
3. A. Jalan, J. W. Allen and W. H. Green, *Phys. Chem. Chem. Phys.*, 2013, **15**, 16841-16852. [doi.org/10.1039/C3CP52598H](https://doi.org/10.1039/C3CP52598H)
4. R. M. Elsamra, A. Jalan, Z. J. Buras, J. E Middaugh. and W. H. Green, *Int. J. Chem. Kinet.*, 2016, **48**, 474-488. [doi.org/10.1002/kin.21007](https://doi.org/10.1002/kin.21007)
5. L. Franzon, J. Peltola, R. Valiev, N. Vuorio, T. Kurtén and A. Eskola, *J. Phys. Chem. A*, 2023, **127**, 744-488. [doi.org/10.1021/acs.jpca.2c07073](https://doi.org/10.1021/acs.jpca.2c07073)
6. J. T. Bartis and B. Widom, *J. Chem. Phys.*, 1974, **60**, 3474-3482. [doi.org/10.1063/1.1681562](https://doi.org/10.1063/1.1681562)



7. S. J. Klippenstein, and J. A. Miller, *J. Phys. Chem. A*, 2002, **106**, 9267-9277.  
[doi.org/10.1021/jp021175t](https://doi.org/10.1021/jp021175t)
8. J. A. Miller, S. J. Klippenstein, S. H. Robertson, M. J. Pilling and N. J. Green, *Phys. Chem. Chem. Phys.*, 2009, **11**, 1128-1137. [doi.org/10.1039/B811312B](https://doi.org/10.1039/B811312B)
9. A. P. Penner and W. Forst, *J. Chem. Phys.*, 1977, **67**, 5296-5307.  
[doi.org/10.1063/1.434708](https://doi.org/10.1063/1.434708)
10. P. Zhang, S. J. Klippenstein, H. Sun and C. K. Law, *Proc. Combust. Inst.*, 2011, **33**, 425-432. [doi.org/10.1016/j.proci.2010.05.010](https://doi.org/10.1016/j.proci.2010.05.010)
11. J. Welty, G. L. Rorrer and D. G. Foster, *Fundamentals of momentum, heat, and mass transfer*. John Wiley & Sons, 2020.
12. K. G. Joback and R. C. Reid, *Chem. Eng. Commun.*, 1987, **57**, 233-243.  
[doi.org/10.1080/00986448708960487](https://doi.org/10.1080/00986448708960487)
13. R. G. Prinn, R. F. Weiss, B. R. Miller, J. Huang, F. N. Alyea, D. M. Cunnold, P. J. Fraser, D. E. Hartley and P. G. Simmonds, *Science*, 1995, **269**, 187-192.  
[doi.org/10.1126/science.269.5221.187](https://doi.org/10.1126/science.269.5221.187)
14. C. W. Spicer, E. G. Chapman, B. J. Finlayson-Pitts, R. A. Plastridge, J. M. Hubbe, J. D. Fast and C. M. Berkowitz, *Nature*, 1998, **394**, 353-356. [doi.org/10.1038/28584](https://doi.org/10.1038/28584)
15. A. Novelli, K. Hens, C. Tatum Ernest, M. Martinez, A. C. Nölscher, V. Sinha, P. Paasonen, T. Petäjä, M. Sipilä, T. Elste and C. Plass-Dülmer, *Atmos. Chem. Phys.*, 2017, **17**, 7807-7826. [doi.org/10.5194/acp-17-7807-2017](https://doi.org/10.5194/acp-17-7807-2017)
16. D. H. Semmes, A. R. Ravishankara, Gump-Perkins, C. A. and Wine, P. H., *Int. J. Chem. Kinet.*, 1985 **17**, 303-313. [doi.org/10.1021/es00090a012](https://doi.org/10.1021/es00090a012)
17. C. A. Cuevas, A. Notario, E. Martínez and J. Albaladejo, *Atmos. Environ.*, 2006, **40**, 3845-3854. [doi.org/10.1016/j.atmosenv.2006.03.001](https://doi.org/10.1016/j.atmosenv.2006.03.001)
